# Supplementary material for: Multi-resonance thermally activated delayed fluorescence polymers for high-efficiency and narrowband solution-processed green OLEDs
Source: Royal Society of Chemistry journal article supplement (doi:10.1039/d4cc03349c), 2024-01-01
Supplement: d4cc03349c1.pdf [file d4cc03349c1.pdf]

## Supporting Information

### Multi-Resonance Thermally Activated Delayed Fluorescence Polymers for High-Efficiency and Narrowband Solution-Processed Green OLEDs

Ke Xu,<sup>†</sup> Nengquan Li,<sup>†</sup> Hong Lin, Zeyuan Ye, Pengcheng Jiang, Jingsheng Miao, Xiaosong Cao\* and Chuluo Yang

Shenzhen Key Laboratory of New Information Display and Storage Materials, College of Materials Science and Engineering, Shenzhen University, Shenzhen 518060, China.

<sup>†</sup> These authors contributed equally to this work.

\*Corresponding Author: xcao@szu.edu.cn (Xiaosong Cao)

### Table of Contents

|                                                        |    |
|--------------------------------------------------------|----|
| 1. Experimental Section .....                          | S2 |
| 1.1. Materials and Methods.....                        | S2 |
| 1.2. Synthesis .....                                   | S2 |
| 1.3. Quantum Chemical Calculations .....               | S4 |
| 1.4. Thermal and Electrochemical Characterization..... | S4 |
| 1.5. Photophysical Characterization .....              | S5 |
| 1.6. Analysis of Rate Constants .....                  | S5 |
| 1.7. Device Fabrication and Characterization.....      | S6 |
| 2. Schemes, Figures and Tables .....                   | S7 |

# 1. Experimental Section

## 1.1. Materials and Methods

All raw materials and anhydrous solvents were commercially available and used without further purification. The reactions were carried out under the protection of the high-purity argon atmosphere. All reactions were heated by metal sand bath (WATTCAS, LAB-500, <https://www.wattcas.com>).  $^1\text{H}$  NMR and  $^{13}\text{C}$  NMR spectra of the materials were measured in  $\text{CDCl}_3$  solvent on the Bruker Advance 400/500 MHz spectrometer, using tetramethylsilane (TMS) as the internal standard. Molecular weights of the polymers were determined by gel permeation chromatography (GPC) on a Waters e2695 Separations Module. Tetrahydrofuran (THF) was used as the eluent and monodisperse polystyrene was used as the standard.

The samples for atomic force microscopy (AFM) test were prepared as follows: PEDOT:PSS was spin-coated onto the pre-cleaned ITO-coated glass substrates, and then sample solutions were spin-coated onto the PEDOT:PSS layer, followed by annealing at 80 °C under a nitrogen atmosphere for 10 min.

## 1.2. Synthesis

**Synthesis of PhCzBN:** Compound **BNCz-Br** (2.00 g, 2.78 mmol), (4-(9*H*-carbazol-9-yl)phenyl)boronic acid (0.96 g, 3.34 mmol),  $\text{Pd}(\text{PPh}_3)_4$  (0.26 g, 0.22 mmol) and  $\text{K}_3\text{PO}_4$  (2.36 g, 11.12 mmol) were added into a 250 mL two-necked flask under argon atmosphere, charged with super dried THF (50 mL) and  $\text{H}_2\text{O}$  (50 mL). Then the mixture was stirred at 70 °C for 12 h. After cooling to room temperature, the mixture was extracted with  $\text{CH}_2\text{Cl}_2$  and dried over anhydrous  $\text{Na}_2\text{SO}_4$ . The solvent was removed by rotary evaporation. Subsequently, the resulting crude product was purified by silica gel column chromatography (eluent: petroleum ether/dichloromethane = 8:1, v/v), giving **PhCzBN** as a yellow solid (1.1 g, yield 45%).  $^1\text{H}$  NMR ( $\text{CDCl}_3$ , 400 MHz)  $\delta$  (ppm): 9.16 (d,  $J = 1.7$ , 2H), 8.64 (s, 2H), 8.53 (d,  $J = 8.9$ , 2H), 8.50 (d,  $J = 1.7$ , 2H), 8.30 (d,  $J = 2.0$ , 2H), 8.20 (dd,  $J = 10.0$ , 8.2, 4H), 7.85 (d,  $J = 8.4$ , 2H), 7.74 (dd,  $J = 8.8$ , 2.0, 2H), 7.63 (d,  $J = 8.2$ , 2H), 7.50 (t,  $J = 7.6$ , 2H), 7.36 (t,  $J = 7.4$ , 2H), 1.69 (s, 18H), 1.55 (s, 18H).  $^{13}\text{C}$  NMR ( $\text{CDCl}_3$ , 100 MHz)  $\delta$  (ppm): 145.45, 145.01, 144.75, 141.76, 140.86, 140.83, 138.32, 137.79, 129.80, 129.22, 127.67, 127.19, 126.09, 124.56, 123.65, 123.58, 120.73, 120.43, 120.17, 117.37, 114.17, 109.94, 107.00, 35.19, 34.83, 32.20, 31.84, 26.92, 11.44.

**Synthesis of target polymers:** The polymerization was performed according to the general procedures of

superacid-catalyzed Friedel-Crafts polyhydroxyalkylation described as follows: In a two-neck round bottom flask, different ratios of **M2** and **PhCzBN** and **M1** (161 mg, 1.00 mmol) were dissolved in 4 mL CH<sub>2</sub>Cl<sub>2</sub>. After cooling to 0 °C, the trifluoromethanesulfonic acid (0.64 mL) was added dropwise into the reaction mixture followed by stirring for 12 h at room temperature under argon atmosphere. Then the reaction mixture was poured slowly into methanol and neutralized with NaOH aqueous solution to get an olive yellow fiber. After sedimentation in methanol twice, the precipitated polymer was washed with hot acetone for 3 days and continuously washed with hot *n*-hexane for another 3 days in a Soxhlet apparatus. Finally, the residue was dried under vacuum to provide an olive yellow solid.

**Synthesis of P0:** **M2** (279 mg, 1.00 mmol) and **M1** (161 mg, 1.00 mmol) were used in the polymerization with the feed ratio (**M2:M1**) of 100:100, yield: 396 mg, 90%. GPC:  $M_n = 13300$ ,  $M_w = 14859$ ,  $M_w/M_n = 1.12$ .

**Synthesis of P5:** **PhCzBN** (44 mg, 0.05 mmol), **M2** (265 mg, 0.95 mmol) and **M1** (161 mg, 1.00 mmol) were used in the polymerization with the feed ratio (**PhCzBN:M2:M1**) of 5:95:100, yield: 384 mg, 85%. According to <sup>1</sup>H NMR analysis, the percentage of **PhCzBN**, **M2** and **M1** repeating unit in the purified random copolymers were calculated to be 2.3%, 47.7% and 50%, with only minor deviation from the monomer feed ratio. GPC:  $M_n = 12143$ ,  $M_w = 13446$ ,  $M_w/M_n = 1.11$ .

**Synthesis of P10:** **PhCzBN** (88 mg, 0.10 mmol), **M2** (251 mg, 0.90 mmol) and **M1** (161 mg, 1.00 mmol) were used in the polymerization with the feed ratio (**PhCzBN:M2:M1**) of 10:90:100, yield: 419 mg, 87%. According to <sup>1</sup>H NMR analysis, the percentage of **PhCzBN**, **M2** and **M1** repeating unit in the purified random copolymers were calculated to be 5.0%, 45.0% and 50%, almost the same with the monomer feed ratio. GPC:  $M_n = 11394$ ,  $M_w = 12409$ ,  $M_w/M_n = 1.09$ .

**Synthesis of P15:** **PhCzBN** (132 mg, 0.15 mmol), **M2** (237 mg, 0.85 mmol) and **M1** (161 mg, 1.00 mmol) were used in the polymerization with the feed ratio (**PhCzBN:M2:M1**) of 15:85:100, yield: 410 mg, 80%. According to <sup>1</sup>H NMR analysis, the percentage of **PhCzBN**, **M2** and **M1** repeating unit in the purified random copolymers were calculated to be 7.4%, 42.6% and 50%, with only minor deviation from the monomer feed ratio. GPC:  $M_n = 11458$ ,  $M_w = 13259$ ,  $M_w/M_n = 1.16$ .

**Synthesis of P20:** **PhCzBN** (176 mg, 0.20 mmol), **M2** (224 mg, 0.80 mmol) and **M1** (161 mg, 1.00 mmol) were used in the polymerization with the feed ratio (**PhCzBN:M2:M1**) of 20:80:100, yield: 472 mg, 87%. According to <sup>1</sup>H NMR analysis, the percentage of **PhCzBN**, **M2** and **M1** repeating unit in the purified

random copolymers were calculated to be 10.0%, 40.0% and 50%, almost the same with the monomer feed ratio. GPC:  $M_n = 12706$ ,  $M_w = 13824$ ,  $M_w/M_n = 1.09$ .

### 1.3. Quantum Chemical Calculations

All of the simulation calculations were carried out with Gaussian 16 program package. Density functional theory (DFT) calculations on the geometrical and electronic properties of the ground-state were performed based on B3LYP density functional method with basis set 6-31G(d,p). The density functional dispersion correction was conducted by Grimme's D3 version with Becke-Johnson damping function. Time-dependent DFT (TD-DFT) calculations were also carried out by this method.

The SOCs between  $S_1$  and  $T_n$  ( $n = 1, 2, 3$ ) states were calculated with PySOC by considering that the three  $T_n$  substrates ( $m = 1, 0, -1$ ) are degenerate, i.e.  $\langle S_1 | \hat{H}_{soc} | T_1 \rangle = \sqrt{\sum_{m=0, \pm 1} \langle S_1 | \hat{H}_{so} | T_1^m \rangle^2}$ , where The  $\hat{H}_{soc}$  represents the interaction of the SOC. All SOCs were obtained at the TD-DFT level of theory using the B3LYP functional and the 6-31G(d,p) basis set.

### 1.4. Thermal and Electrochemical Characterization

Thermogravimetric analysis (TGA) measurements were conducted on a TGA-Q50 Instrument (TA Instruments, America), with a heating rate of 20 °C/min under an argon atmosphere. The thermal decomposition temperatures ( $T_d$ ) were determined by the recorded temperature at 5% weight loss. Differential scanning calorimetry (DSC) was performed at a heating rate of 10 °C/min using a TA DSC-Q200 (TA Instruments, America) under argon atmosphere. Heating/cooling/re-heating scans were performed, and the DSC curves were obtained from the second heating scan.

Cyclic voltammetry (CV) measurements were carried out on a CHI600 electrochemical analyzer (Chenhua, China) at room temperature, with a conventional three-electrode system consisting of a glassy carbon working electrode, a platinum wire auxiliary electrode, and an Ag/AgCl standard electrode was used as the reference electrode. Dichloromethane and 0.1 M tetrabutylammonium hexafluorophosphate ( $Bu_4NPF_6$ ) were used as the solvent and supporting electrolyte, respectively. The sweep speed was set as 50 mV s<sup>-1</sup>. The onset of oxidation potential was adopted for the calculation of HOMO energy level based on the equation  $E_{HOMO}$  (eV) = - (4.80 -  $E_{Fc/Fc^+}$  +  $E_{ox}$ ) eV. The LUMO energy levels of the compounds were then deduced from the HOMO levels and the UV-Vis absorption onsets of the longer wavelength.

## 1.5. Photophysical Characterization

UV-vis absorption spectra were obtained on a Shimadzu UV-2600 spectrophotometer (Shimadzu, Japan) at room temperature. Room-temperature photoluminescence spectra were measured on a Hitachi F-7100 fluorescence spectrophotometer (Hitachi, Japan). Phosphorescence spectra were measured both in toluene and neat film states at 77 K. The film samples were prepared by spin-coating using chlorobenzene as solvent. The PL lifetimes were measured by a single photon counting spectrometer from Edinburgh Instruments (FLS920) with a Picosecond Pulsed UV-LASTER (LASTER377) as the excitation source. The solid state absolute photoluminescence quantum yields ( $\Phi_{PL}$ ) were measured on a Hamamatsu UV-NIR absolute PL quantum yield spectrometer (C13534, Hamamatsu Photonics) equipped with a calibrated integrating sphere, and all the samples were excited at 320 nm. During the  $\Phi_{PL}$  measurements, the integrating sphere was purged with pure and dry nitrogen to maintain an inert environment.

## 1.6. Analysis of Rate Constants

The estimation of rate constants pertaining to radiative decay ( $k_r$ ) and nonradiative decay ( $k_{nr}$ ) transitioning from  $S_1$  to  $S_0$ , as well as the rate constants associated with intersystem crossing ( $k_{ISC}$ ) and reverse intersystem crossing ( $k_{RISC}$ ), can be accomplished by employing the subsequent equations.

$$k_r = \Phi_p k_p + \Phi_d k_d \approx \Phi_p k_p \dots\dots\dots \text{Eq.(1)}$$

$$k_{nr} = \frac{1 - \Phi_{PL}}{\Phi_{PL}} k_r \dots\dots\dots \text{Eq.(2)}$$

$$k_{ISC} = k_p - k_r - k_{nr} \dots\dots\dots \text{Eq.(3)}$$

$$k_{RISC} = (k_p k_d \Phi_d) / (k_{ISC} \Phi_p) \dots\dots\dots \text{Eq.(4)}$$

Where  $k_p$  and  $k_d$  represent the decay rate constants for prompt and delayed fluorescence, respectively, which are in reciprocal relationship with the decay time constants ( $\tau_p$  and  $\tau_d$ ) experimentally determined from transient PL characteristics.  $\Phi_p$  and  $\Phi_d$  indicate prompt and delayed fluorescence components and can be distinguished from the total  $\Phi_{PL}$  by comparing the integrated intensities of prompt ( $r_p$ ) and delayed components ( $r_d$ ) in the transient PL spectra.  $r_p$  and  $r_d$  were determined using  $\tau_p$  and  $\tau_d$  and fitting parameter ( $A_p, A_d$ ) as follows.

$$I(t) = A_p e^{-\frac{1}{\tau_p} t} + A_d e^{-\frac{1}{\tau_d} t} \dots\dots\dots \text{Eq.(5)}$$

$$r_p = A_p \tau_p / (A_p \tau_p + A_d \tau_d) \dots\dots\dots \text{Eq.(6)}$$

$$r_d = A_d \tau_d / (A_p \tau_p + A_d \tau_d) \dots \dots \dots \text{Eq. (7)}$$

### 1.7. Device Fabrication and Measurement

The ITO-coated glass substrates were ultrasonicated sequentially in acetone and ethanol, followed by the treatment in a UV-ozone oven for 20 min. Afterwards, PEDOT:PSS was spin-coated onto the ITO substrates at ambient temperature at a speed of 4000 rpm for 30 s (~35 nm). The PEDOT:PSS coated ITO substrates were baked at 120 °C for 10 min and then transferred to a glove box with N<sub>2</sub> atmosphere. The emissive layer (using chlorobenzene as the solvent, 10 mg/mL) was spin-coated onto the PEDOT:PSS layer at a speed of 3000 rpm for 30 s (~35 nm), followed by an annealing process (55 °C for 10 min). Then, the exciton blocking layer (DPEPO, 10 nm), electron-transporting layer (TmPyPB, 50 nm), electron injecting layer (Liq, 1 nm) and cathode (aluminum, 100 nm) were consecutively evaporated in a vacuum chamber under  $2 \times 10^{-4}$  pa. The devices were tested in ambient environment without encapsulation. The current density-voltage-luminance (*J-V-L*), *L*-EQE curves, and electroluminescence spectra were measured using a Keithley 2400 source meter coupled with an absolute EQE measurement system (C9920-12, Hamamatsu Photonics, Japan).

## 2. Schemes, Figures and Tables

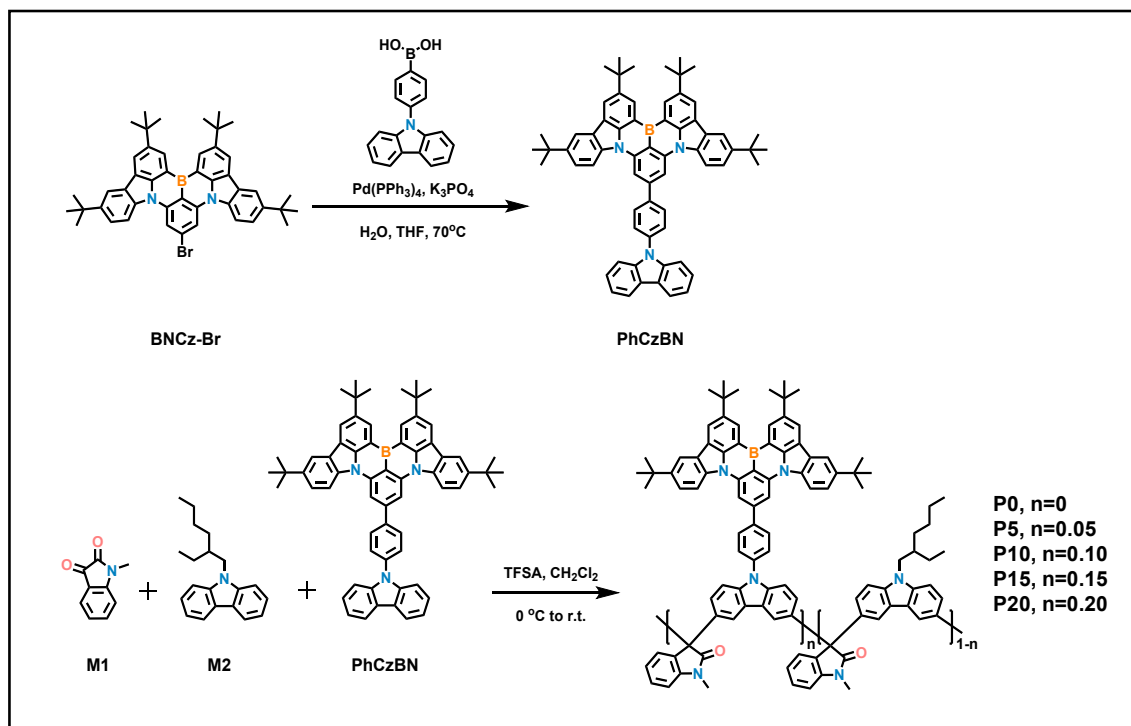

**Scheme S1.** Synthetic route of **PhCzBN** and **P0-P20** polymers.

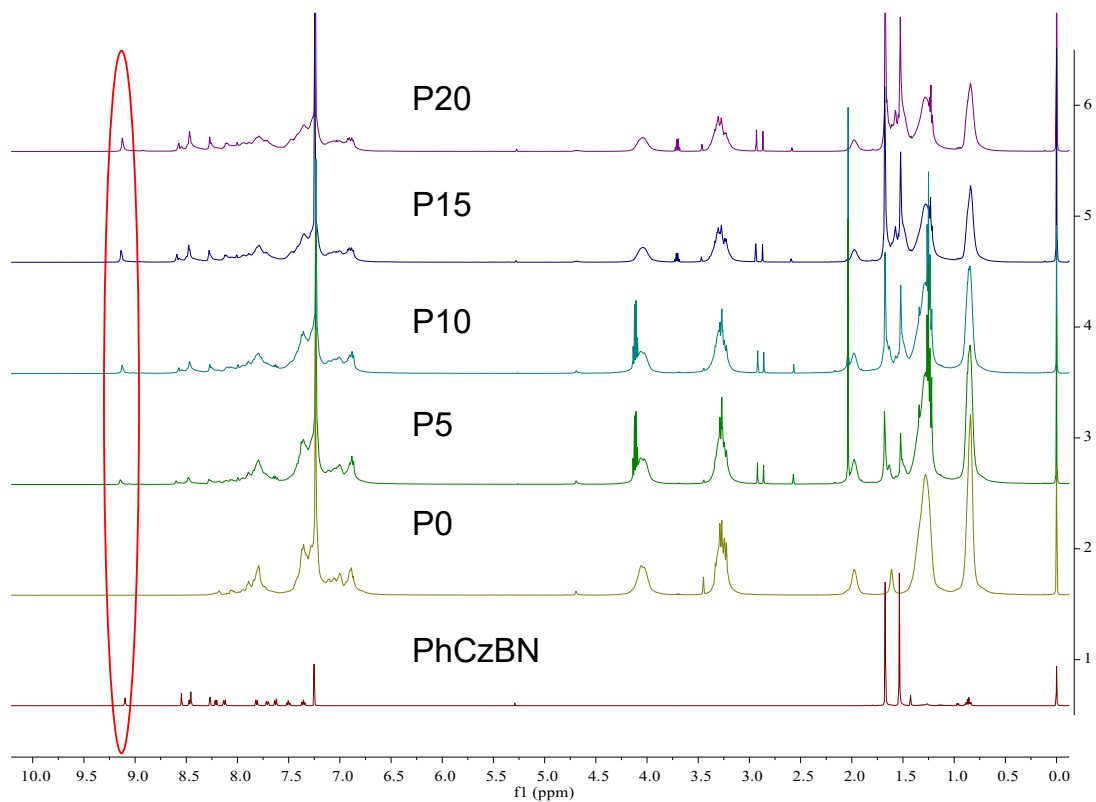

**Figure S1.** <sup>1</sup>H NMR spectrum of **PhCzBN** and **P0-P20** polymers in CDCl<sub>3</sub> (500 MHz, 25 °C). The red circle represents the characteristic peak of the MR-TADF moiety located at 9.12 ppm.

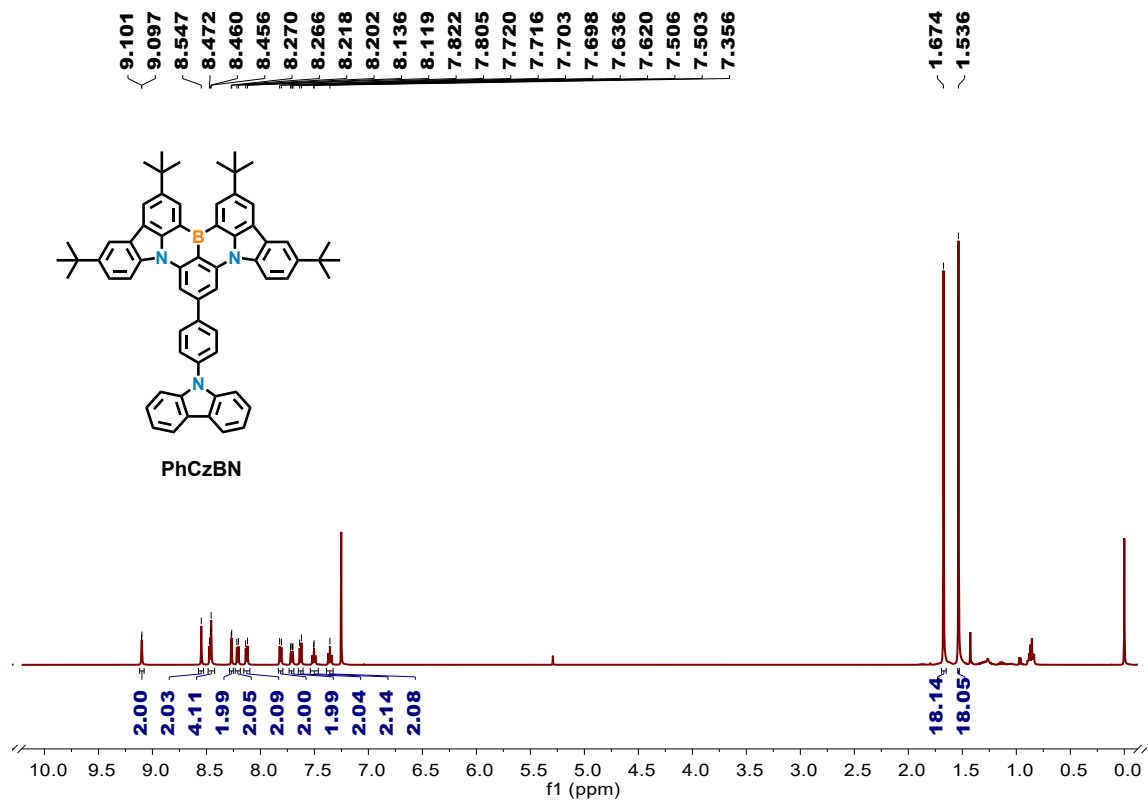

Figure S2.  $^1\text{H}$  NMR spectrum of PhCzBN in  $\text{CDCl}_3$  (400 MHz, 25  $^\circ\text{C}$ ).

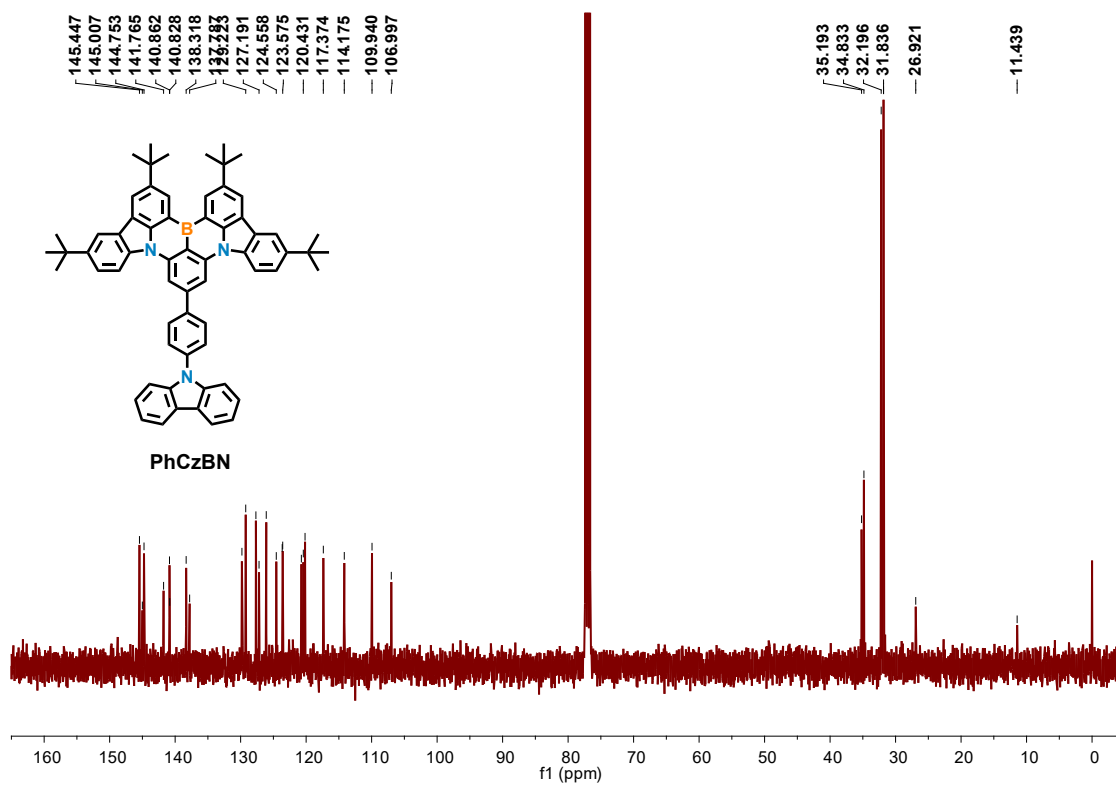

Figure S3.  $^{13}\text{C}$  NMR spectrum of PhCzBN in  $\text{CDCl}_3$  (100 MHz, 25  $^\circ\text{C}$ ).



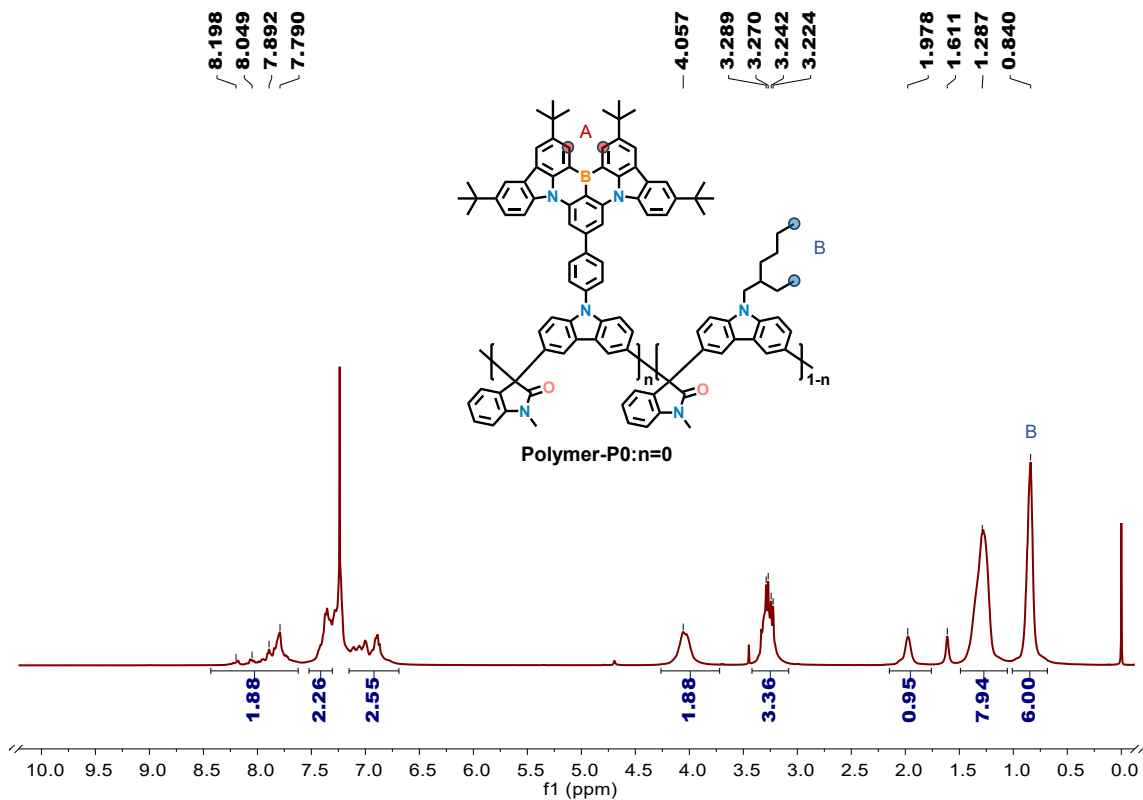

Figure S4.  $^1\text{H}$  NMR spectrum of **P0** in  $\text{CDCl}_3$  (500 MHz, 25  $^\circ\text{C}$ ).

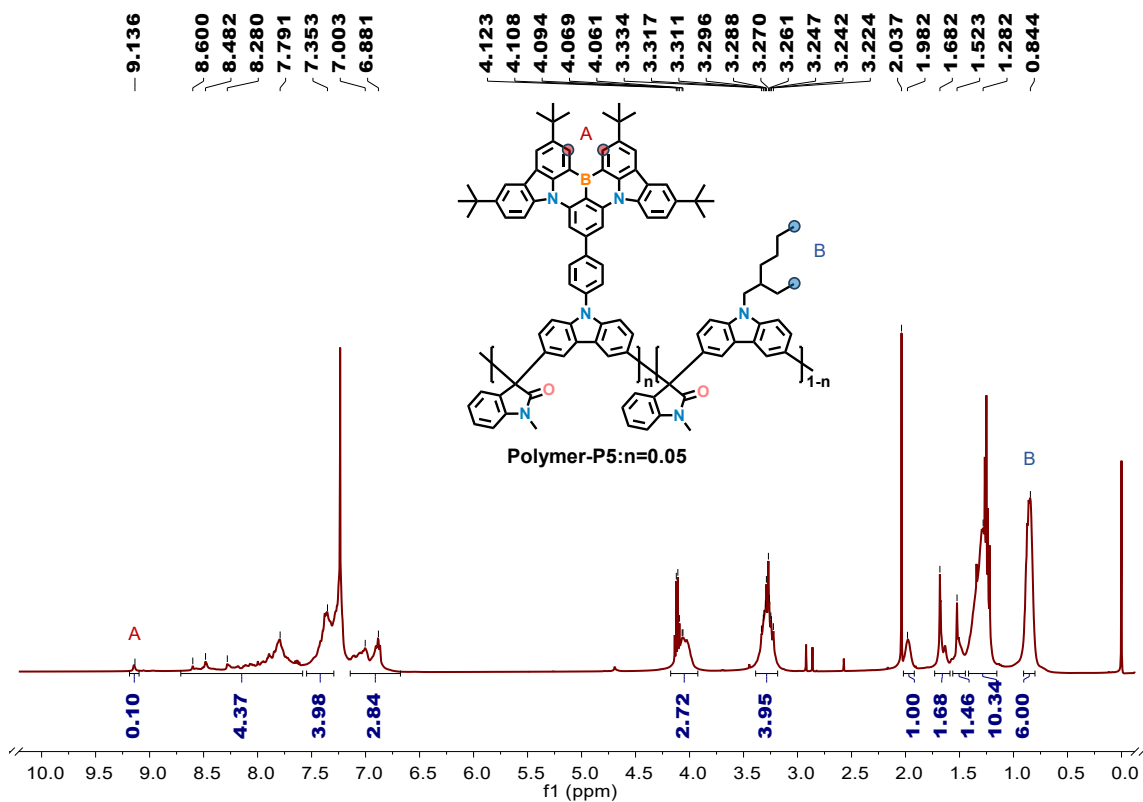

Figure S5.  $^1\text{H}$  NMR spectrum of **P5** in  $\text{CDCl}_3$  (500 MHz, 25  $^\circ\text{C}$ ).

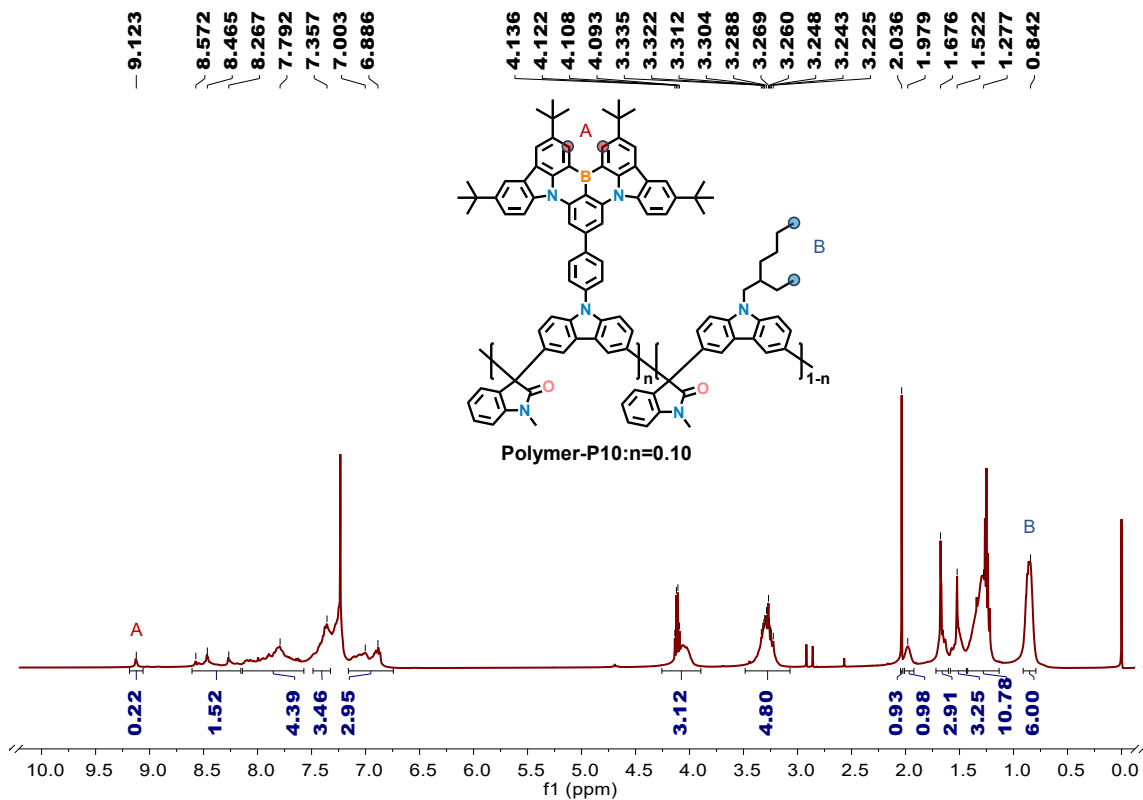

**Figure S6.**  $^1\text{H}$  NMR spectrum of **P10** in  $\text{CDCl}_3$  (500 MHz, 25  $^\circ\text{C}$ ).

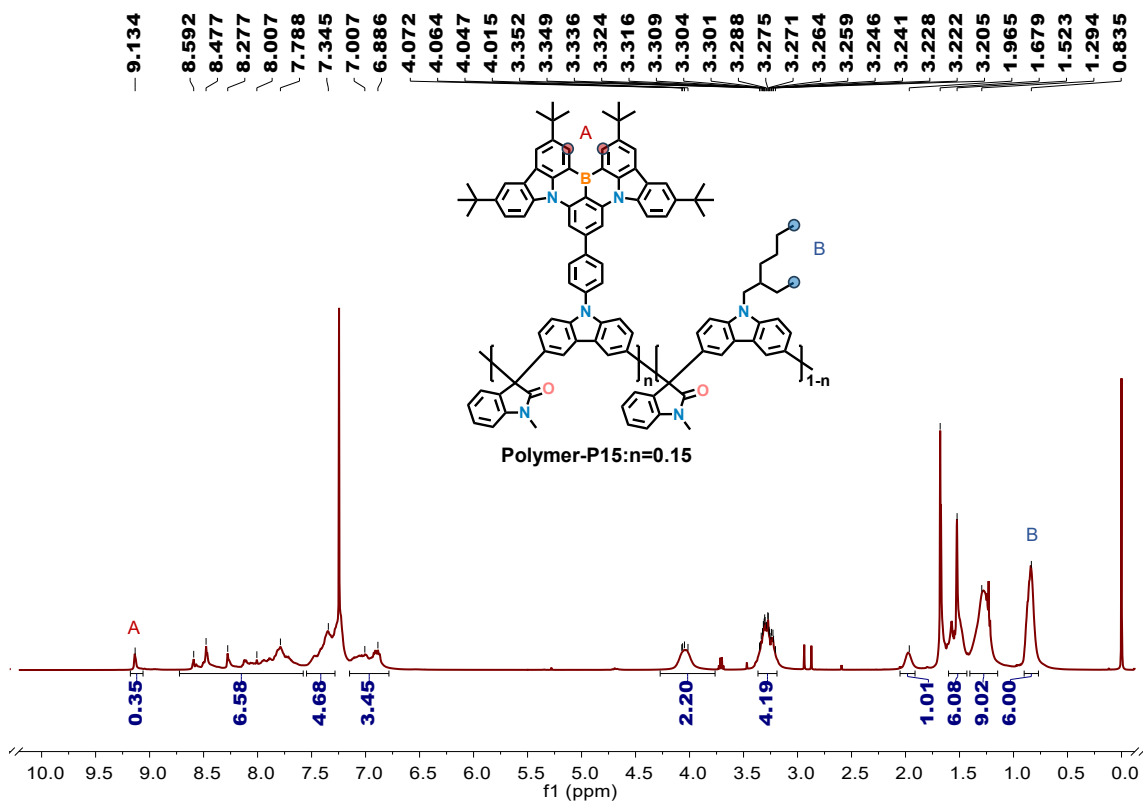

**Figure S7.**  $^1\text{H}$  NMR spectrum of **P15** in  $\text{CDCl}_3$  (500 MHz, 25  $^\circ\text{C}$ ).

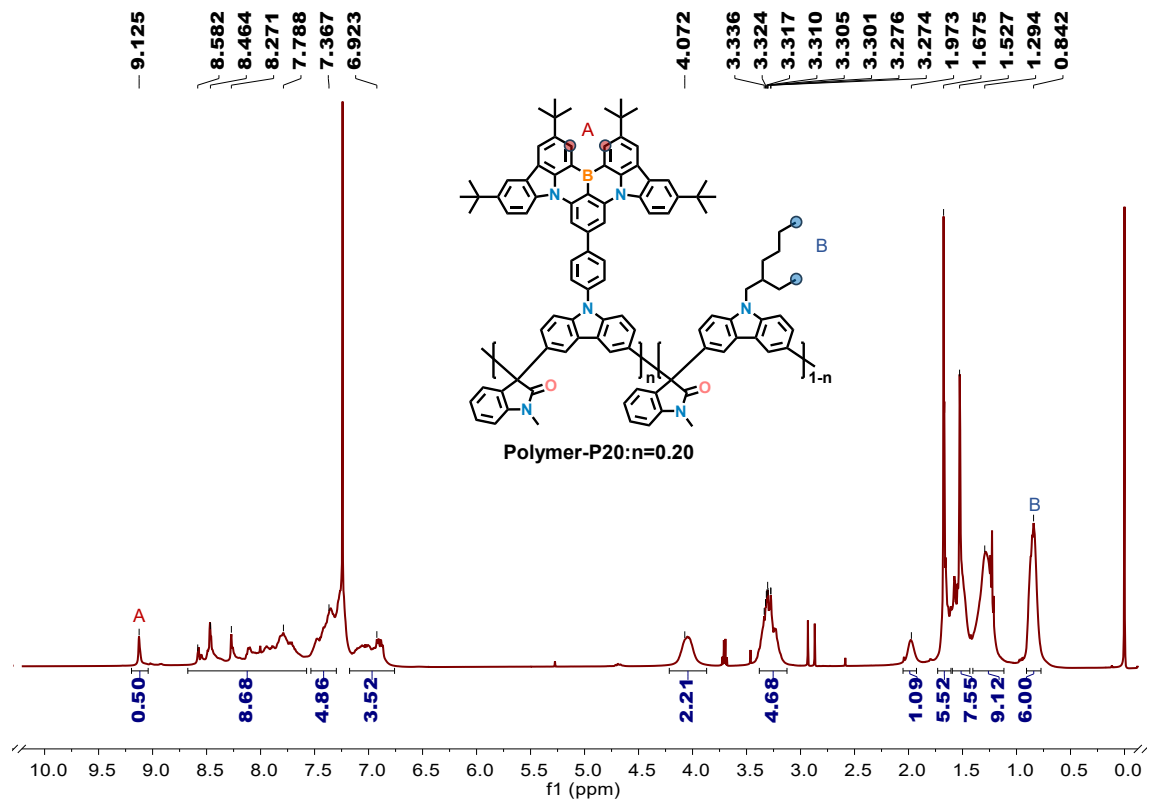

**Figure S8.**  $^1\text{H}$  NMR spectrum of **P20** in  $\text{CDCl}_3$  (500 MHz, 25  $^\circ\text{C}$ ).

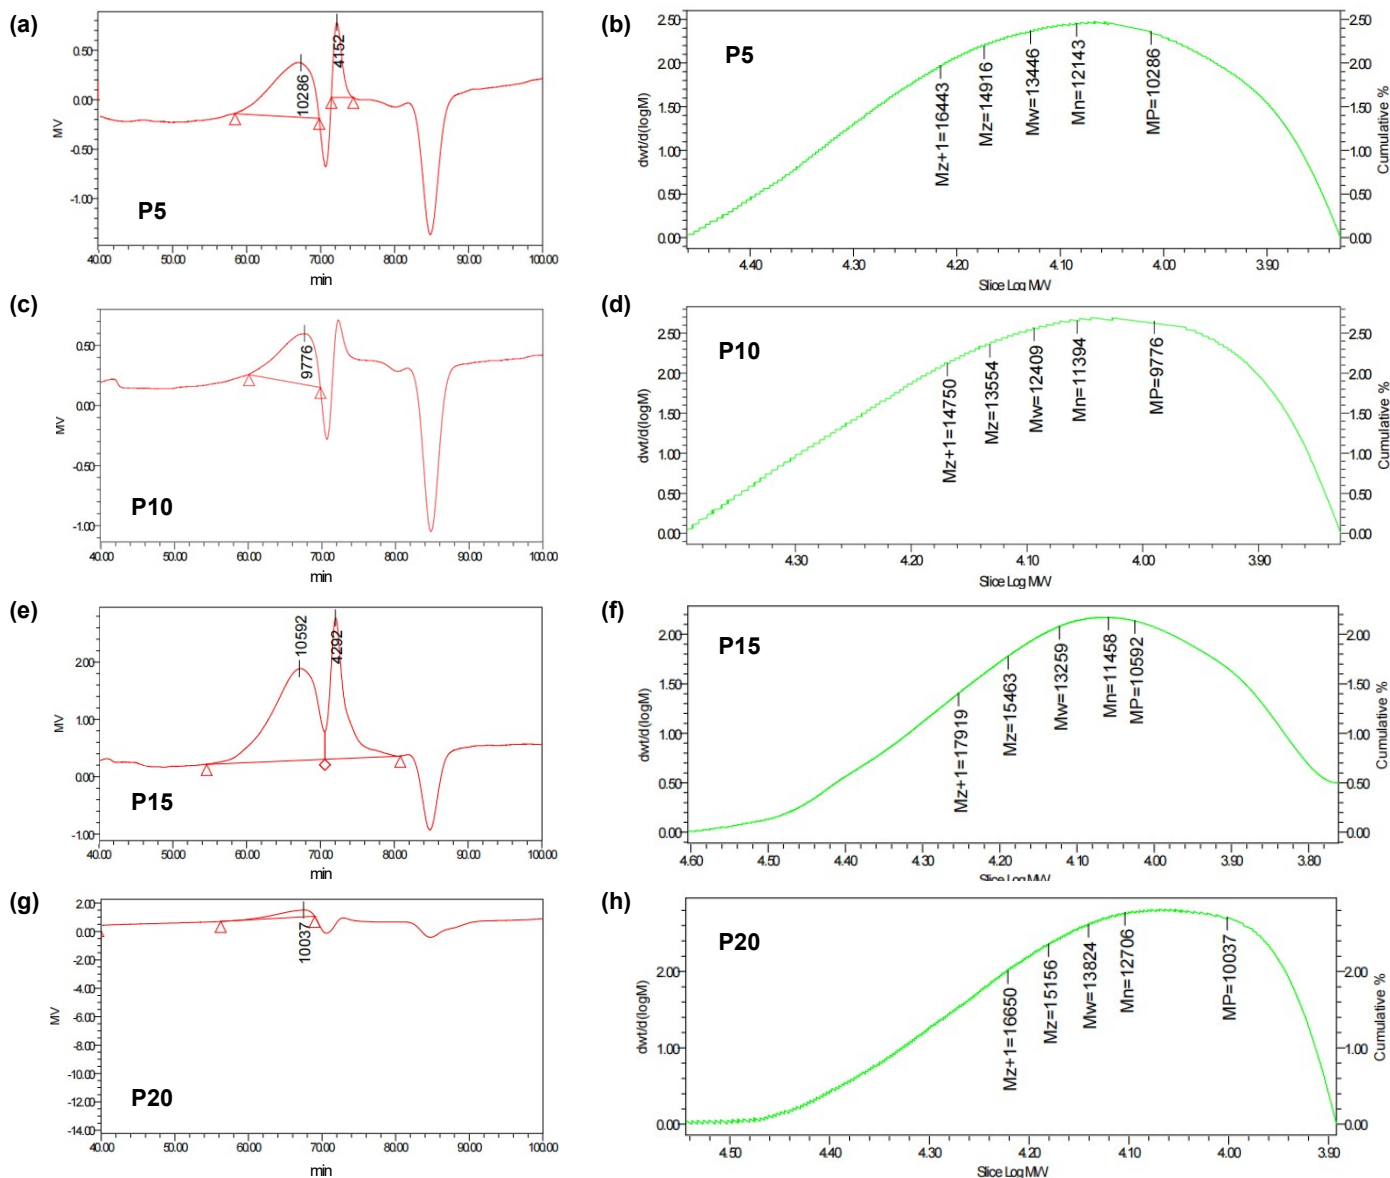

**Figure S9.** GPC chromatograms of (a) **P5**, (c) **P10**, (e) **P15**, (g) **P20** as a function of retention time, and schematic diagram of average molecular weights ( $M_{z+1}$ ,  $M_z$ ,  $M_w$ ,  $M_n$ ,  $M_p$ ) from the GPC spectra for (b) **P5**, (d) **P10**, (f) **P15**, (h) **P20**.

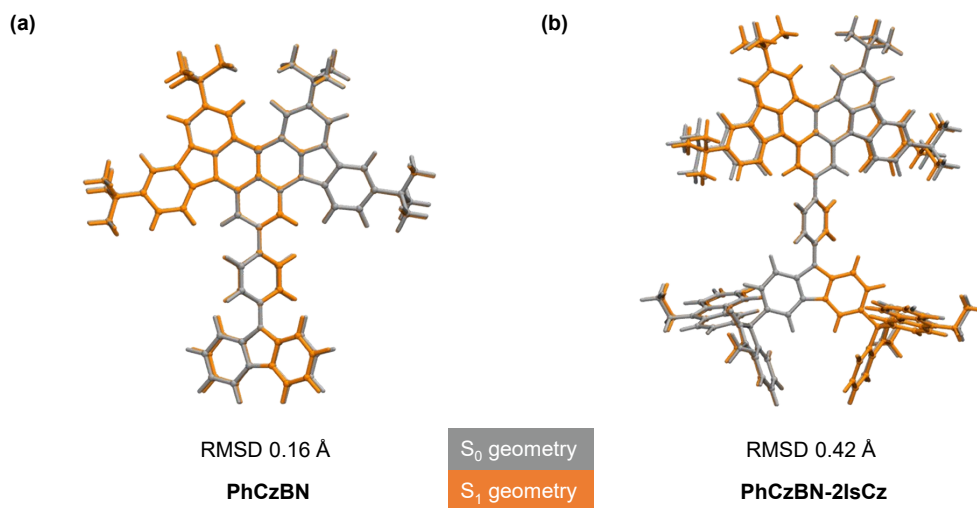

**Figure S10.** Comparison of the optimized conformations in the S<sub>0</sub> (gray) and S<sub>1</sub> (yellow) states with RMSD values for (a) **PhCzBN** and (b) **PhCzBN-2IsCz**.

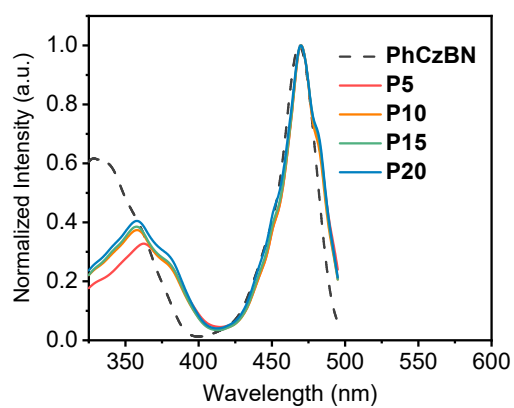

**Figure S11.** Excitation spectra of the **PhCzBN** and **P5-P20** polymers measured at corresponding peak wavelengths in toluene ( $1 \times 10^{-5}$  M).

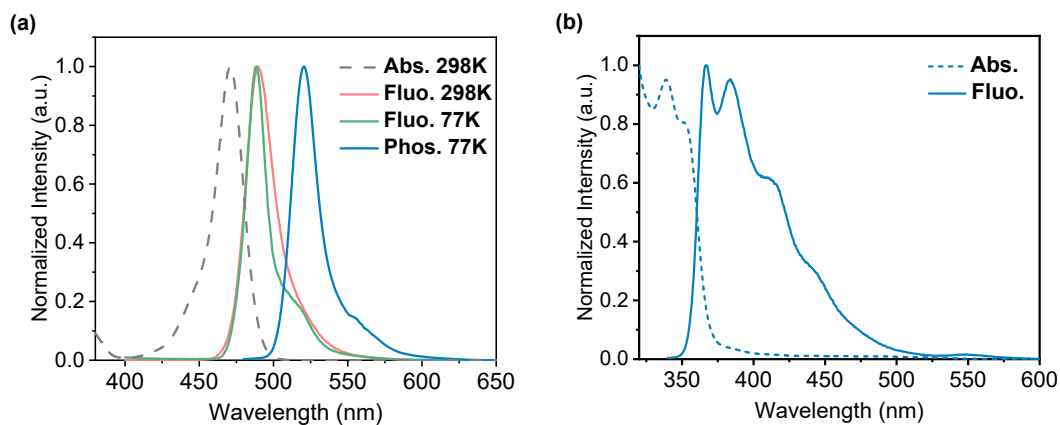

**Figure S12.** (a) UV-vis absorption (298 K), fluorescence (298 K and 77 K), and phosphorescence (77 K) spectra of **PhCzBN** in toluene ( $1 \times 10^{-5}$  M), . (b) UV-vis absorption (298 K), and fluorescence (298 K) spectra of **P0** (polymer without the **PhCzBN** unit) in toluene ( $1 \times 10^{-5}$  M).

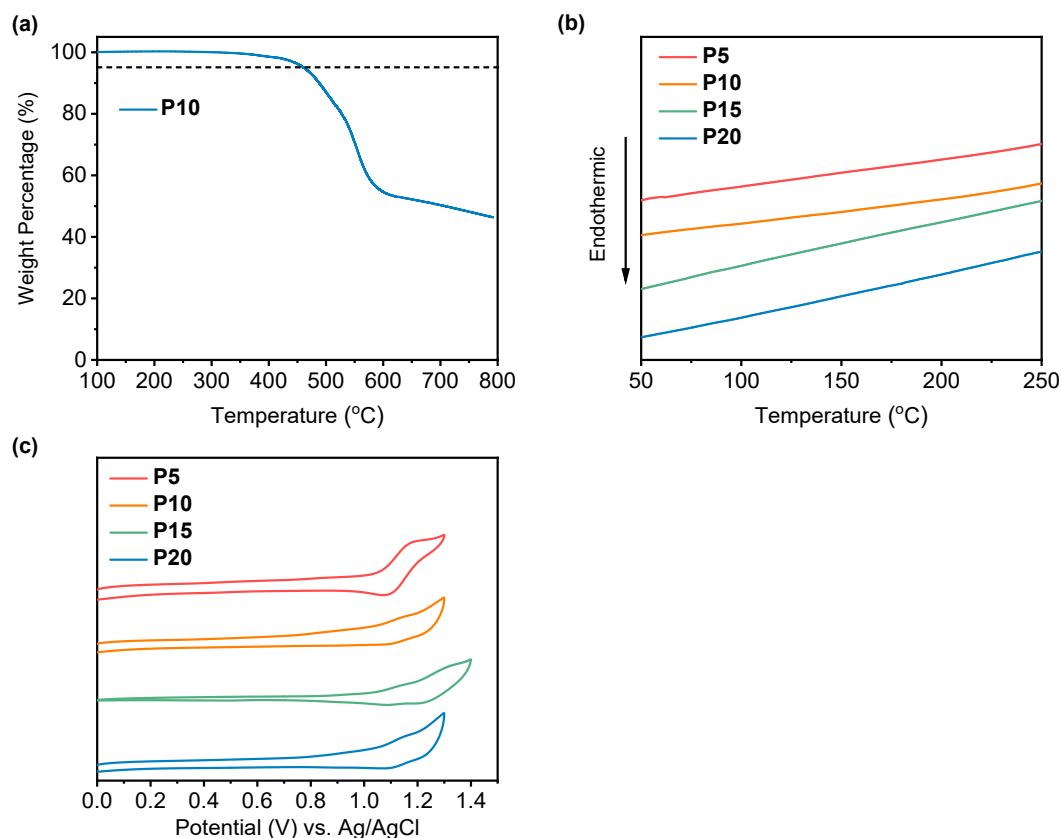

**Figure S13.** (a) Thermal gravimetric analysis (TGA) curves of **P10** at a heating rate of  $10 \text{ }^\circ\text{C min}^{-1}$ , (b) Differential scanning calorimetry (DSC) curves of **P5-P20** polymers at a heating rate of  $10 \text{ }^\circ\text{C min}^{-1}$ , (c) the oxidation curves obtained from the cyclic voltammetry (CV) measurement for **P5-P20** polymers. The HOMO energy levels of the polymers were calculated as  $-5.36$ ,  $-5.38$ ,  $-5.41$ , and  $-5.43$  eV for **P5**, **P10**, **P15**, and **P20**,

respectively, based on the oxidation onsets. Based on the HOMO values and energy gaps ( $E_g$ ) deduced from absorption edges, the LUMO energy levels were calculated to be -2.89, -2.90, -2.92, and -2.89 eV, respectively.

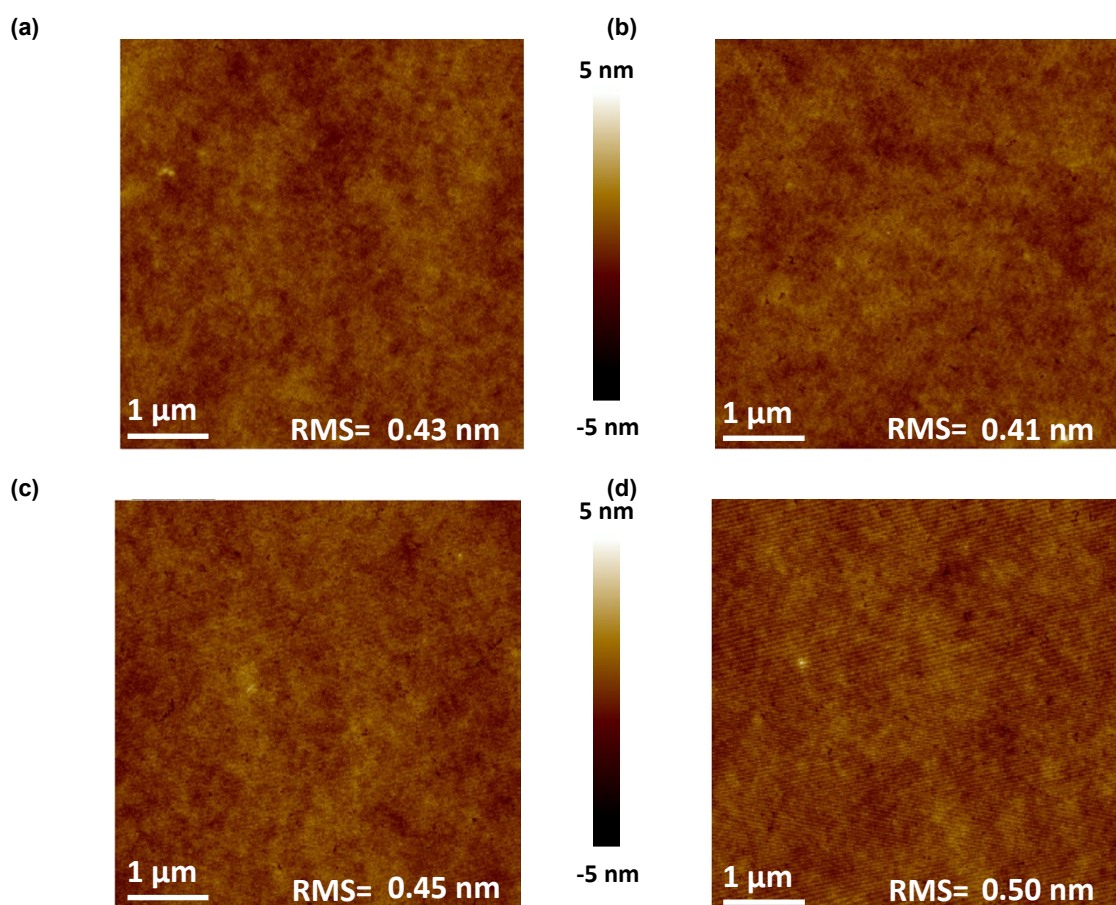

**Figure S14.** AFM images of the solution-processed films based on (a) P5, (b) P10, (c) P15 and (d) P20. Note: The doping concentration was 10 wt% with mCP host, and the films were prepared by spin-coating onto the PEDOT:PSS coated ITO substrates, annealed at a temperature of 50 °C before measurement.

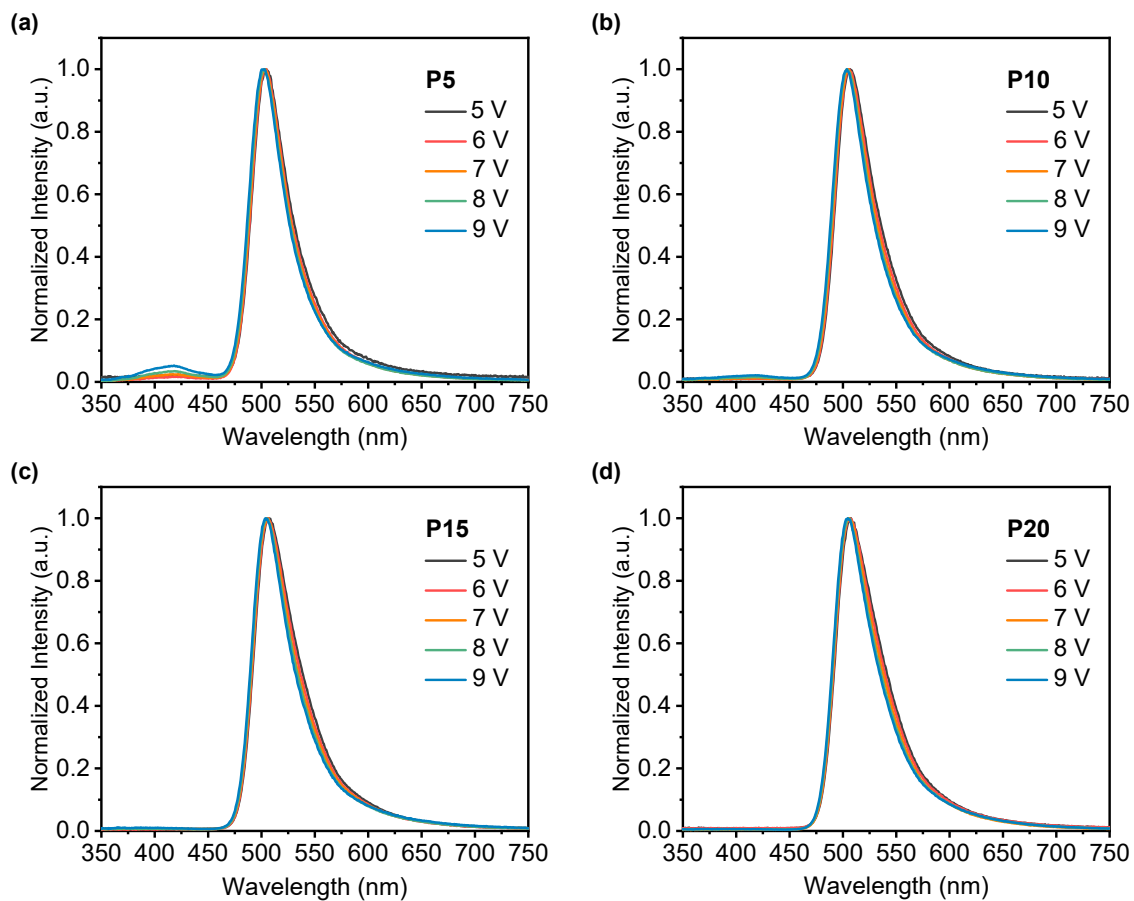

**Figure S15.** Electroluminescence spectra of the devices based on (a) **P5**, (b) **P10**, (c) **P15** and (d) **P20** at different voltages.



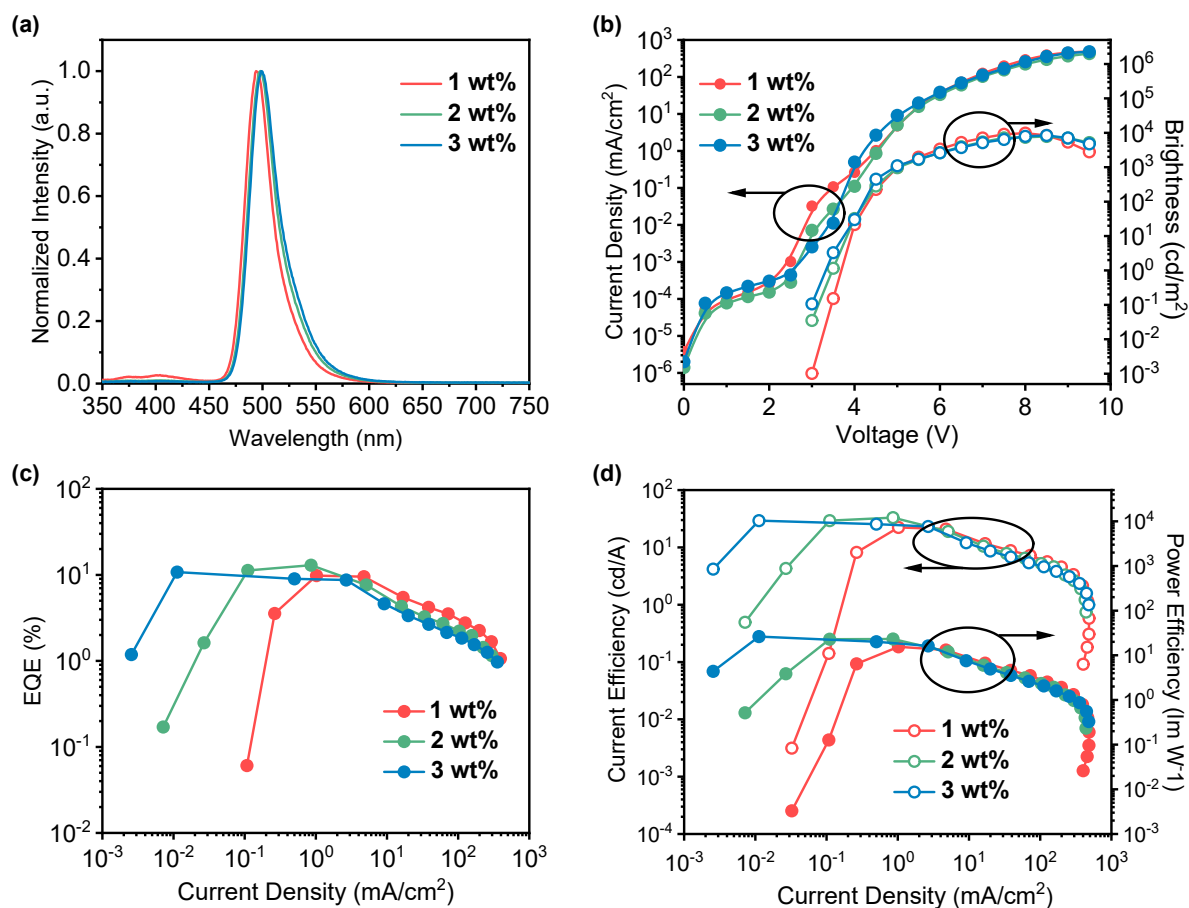

**Figure S16.** Electroluminescence performance of **PhCzBN** based devices: (a) electroluminescence spectra, (b) current density-voltage-luminance, (c) external quantum efficiency-current density, (d) current efficiency-current density-power efficiency characteristics. Device structure: ITO/PEDOT: PSS (35 nm)/mCP: 1-3 wt% **PhCzBN** (35 nm)/DPEPO (10 nm)/TmPyPB (50 nm)/Liq (2 nm)/Al (100 nm).

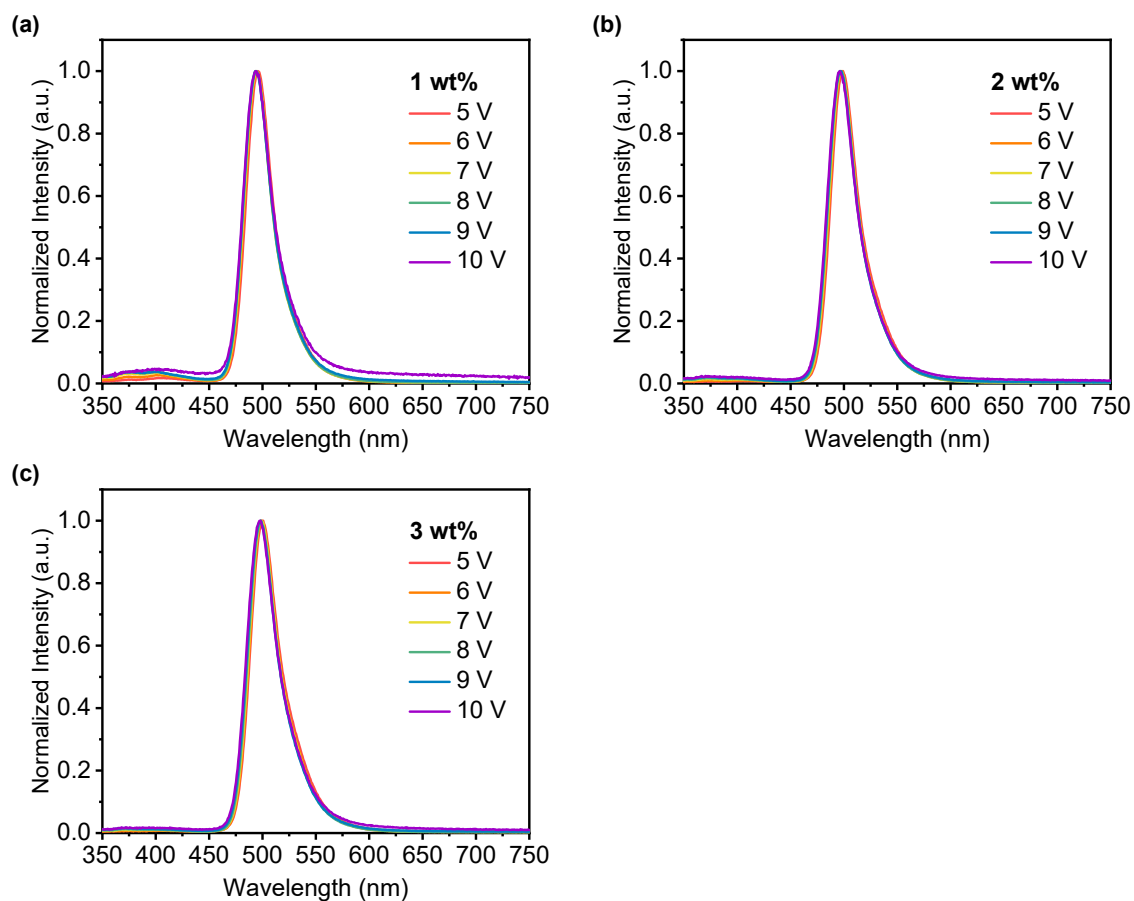

**Figure S17.** Voltage-dependent electroluminescence spectra of the devices based on **PhCzBN** with doping concentrations of (a) 1 wt%, (b) 2 wt%, and (c) 3 wt%.

**Table S1.** Photophysical data of **P5**, **P10**, **P15**, and **P20** in dilute solution ( $1 \times 10^{-5}$  M).

| emitter       | $\lambda_{\text{abs}}^{[a]}$<br>(nm) | $\lambda_{\text{PL}}^{[b]}$<br>(nm) | FWHM <sup>[c]</sup><br>(nm) | $\lambda_{\text{Phos}}^{[d]}$<br>(nm) | $S_1^{[e]}$<br>(eV) | $T_1^{[f]}$<br>(eV) | $\Delta E_{\text{ST}}^{[g]}$<br>(eV) |
|---------------|--------------------------------------|-------------------------------------|-----------------------------|---------------------------------------|---------------------|---------------------|--------------------------------------|
| <b>PhCzBN</b> | 471                                  | 490                                 | 23                          | 520                                   | 2.63                | 2.47                | 0.16                                 |
| <b>P5</b>     | 471                                  | 500                                 | 34                          | 518                                   | 2.63                | 2.47                | 0.16                                 |
| <b>P10</b>    | 471                                  | 503                                 | 35                          | 519                                   | 2.62                | 2.46                | 0.16                                 |
| <b>P15</b>    | 472                                  | 505                                 | 37                          | 520                                   | 2.60                | 2.45                | 0.15                                 |
| <b>P20</b>    | 472                                  | 506                                 | 38                          | 520                                   | 2.58                | 2.44                | 0.14                                 |

<sup>[a]</sup> Absorption peaks; <sup>[b]</sup> emission peaks; <sup>[c]</sup> emission full width at half maximum; <sup>[d]</sup> phosphorescence peak; <sup>[e]</sup> singlet energy levels obtained from onset of photoluminescence spectra; <sup>[f]</sup> triplet energy levels obtained from 77 K PL in toluene; <sup>[g]</sup> singlet-triplet energy gap.

**Table S2.** Photophysical properties of **P5-P20** doped in mCP films with 10 wt% concentration.

| Emitter    | $\lambda_{\text{em}}^{[a]}$<br>(nm) | FWHM <sup>[b]</sup><br>(nm) | $\Phi_{\text{PL}}^{[c]}$<br>(%) | $\tau_{\text{PF}}^{[d]}$<br>(ns) | $\tau_{\text{DF}}^{[e]}$<br>( $\mu\text{s}$ ) | $k_{\text{r,S}}^{[f]}$<br>( $10^7 \text{ s}^{-1}$ ) | $k_{\text{nr,S}}^{[g]}$<br>( $10^7 \text{ s}^{-1}$ ) | $k_{\text{ISC}}^{[h]}$<br>( $10^7 \text{ s}^{-1}$ ) | $k_{\text{RISC}}^{[i]}$<br>( $10^4 \text{ s}^{-1}$ ) |
|------------|-------------------------------------|-----------------------------|---------------------------------|----------------------------------|-----------------------------------------------|-----------------------------------------------------|------------------------------------------------------|-----------------------------------------------------|------------------------------------------------------|
| <b>P5</b>  | 500                                 | 34                          | 71                              | 5.4                              | 14.3                                          | 9.7                                                 | 4.0                                                  | 4.9                                                 | 9.5                                                  |
| <b>P10</b> | 503                                 | 35                          | 73                              | 5.3                              | 13.0                                          | 10.6                                                | 3.9                                                  | 4.4                                                 | 10.0                                                 |
| <b>P15</b> | 505                                 | 37                          | 61                              | 5.2                              | 11.7                                          | 9.2                                                 | 5.9                                                  | 4.1                                                 | 10.9                                                 |
| <b>P20</b> | 506                                 | 38                          | 55                              | 5.2                              | 10.8                                          | 8.6                                                 | 7.1                                                  | 3.5                                                 | 11.3                                                 |

<sup>[a]</sup> Emission peak; <sup>[b]</sup> full-width at half-maximum; <sup>[c]</sup> photoluminescence quantum yield; <sup>[d]</sup> prompt fluorescence lifetime; <sup>[e]</sup> delayed fluorescence lifetime; <sup>[f]</sup> radiative decay rate constant of singlet exciton; <sup>[g]</sup> non-radiative decay rate constant of singlet exciton; <sup>[h]</sup> rate constant of intersystem crossing; <sup>[i]</sup> rate constant of reverse intersystem crossing.

**Table S3.** Summary of the device performances of the solution-processed TADF OLEDs.

| Dopant        | V <sub>on</sub><br>(V) | EQE <sup>[a]</sup><br>(%) | CE <sup>[b]</sup><br>(cd A <sup>-1</sup> ) | PE <sup>[c]</sup><br>(lm W <sup>-1</sup> ) | L <sup>[d]</sup><br>(cd m <sup>-2</sup> ) | λ <sub>EL</sub> <sup>[e]</sup><br>(nm) | FWHM<br>(nm) | CIE <sup>[f]</sup><br>(x,y) |
|---------------|------------------------|---------------------------|--------------------------------------------|--------------------------------------------|-------------------------------------------|----------------------------------------|--------------|-----------------------------|
| <b>PhCzBN</b> | 3.5                    | 13.0/12.2/7.6             | 33.1                                       | 23.1                                       | 7843                                      | 497                                    | 31           | (0.11, 0.57)                |
| <b>P5</b>     | 3.9                    | 15.0/8.5/1.2              | 43.6                                       | 30.4                                       | 1152                                      | 502                                    | 40           | (0.19,0.60)                 |
| <b>P10</b>    | 3.9                    | 19.4/6.2/1.5              | 60.2                                       | 37.8                                       | 1644                                      | 505                                    | 42           | (0.20, 0.62)                |
| <b>P15</b>    | 3.9                    | 13.7/6.8/-                | 43.0                                       | 31.8                                       | 947                                       | 506                                    | 44           | (0.23, 0.63)                |
| <b>P20</b>    | 3.9                    | 12.1/6.5/                 | 38.5                                       | 26.9                                       | 1020                                      | 508                                    | 47           | (0.23, 0.63)                |

<sup>[a]</sup> External quantum efficiency at maximum/100/1000 cd m<sup>-2</sup>; <sup>[b]</sup> maximum current efficiency; <sup>[c]</sup> maximum power efficiency; <sup>[d]</sup> maximum brightness; <sup>[e]</sup> electroluminescence peak at ~500 cd m<sup>-2</sup>; <sup>[f]</sup> the 1931 Commission Internationale de L'Eclairage (CIE) coordinates of devices measured at a brightness of 1000 cd m<sup>-2</sup>.

**Table S4.** Summary of TD-DFT data for of the MR-TADF unit and polymer model compound.

| Compound            | Transition                     | Wavelength (nm) | Energy (eV) | Oscillator Strength | Coefficient of Orbital                                                                                                                                                                               |
|---------------------|--------------------------------|-----------------|-------------|---------------------|------------------------------------------------------------------------------------------------------------------------------------------------------------------------------------------------------|
| <b>PhCzBN</b>       | S <sub>0</sub> -S <sub>1</sub> | 440.22          | 2.8164      | 0.3838              | HOMO→LUMO (0.9821)                                                                                                                                                                                   |
|                     | S <sub>0</sub> -T <sub>1</sub> | 515.41          | 2.4055      | 0.0000              | HOMO→LUMO (0.9476)                                                                                                                                                                                   |
|                     | S <sub>0</sub> -T <sub>2</sub> | 439.68          | 2.8199      | 0.0000              | HOMO-5→LUMO+2 (0.0619)<br>HOMO-4→LUMO (0.6304)<br>HOMO-4→LUMO+1 (0.0504)<br>HOMO-4→LUMO+2 (0.0507)<br>HOMO-2→LUMO+2 (0.0454)<br>HOMO→LUMO (0.0206)                                                   |
|                     | S <sub>0</sub> -T <sub>3</sub> | 436.57          | 2.8399      | 0.0000              | HOMO-6→LUMO (0.0691)<br>HOMO-5→LUMO (0.1131)<br>HOMO-5→LUMO+1 (0.0224)<br>HOMO-5→LUMO+2 (0.0266)<br>HOMO-4→LUMO+2 (0.0736)<br>HOMO-2→LUMO (0.4020)<br>HOMO-1→LUMO (0.1290)<br>HOMO-1→LUMO+1 (0.0239) |
| <b>PhCzBN-2IsCz</b> | S <sub>0</sub> -S <sub>1</sub> | 440.29          | 2.8160      | 0.3693              | HOMO→LUMO (0.9823)                                                                                                                                                                                   |
|                     | S <sub>0</sub> -T <sub>1</sub> | 515.11          | 2.4070      | 0.0000              | HOMO→LUMO (0.9474)                                                                                                                                                                                   |
|                     | S <sub>0</sub> -T <sub>2</sub> | 439.48          | 2.8212      | 0.0000              | HOMO-11→LUMO+2 (0.0604)<br>HOMO-9→LUMO (0.6302)<br>HOMO-9→LUMO+1 (0.0459)<br>HOMO-9→LUMO+2 (0.0556)<br>HOMO-7→LUMO+2 (0.0428)<br>HOMO→LUMO (0.0205)                                                  |
|                     | S <sub>0</sub> -T <sub>3</sub> | 437.11          | 2.8364      | 0.0000              | HOMO-12→LUMO (0.0761)<br>HOMO-11→LUMO (0.0903)<br>HOMO-11→LUMO+2 (0.0260)<br>HOMO-9→LUMO+2 (0.0567)<br>HOMO-7→LUMO (0.3617)<br>HOMO-3→LUMO (0.0742)<br>HOMO-1→LUMO (0.1189)                          |

**Table S5.** Cartesian coordinates of **PhCzBN** at the optimized S<sub>0</sub> geometry.

-----  
Center Atomic Atomic Coordinates (Angstroms)  
Number Number Type X Y Z  
-----

|    |   |   |           |           |           |
|----|---|---|-----------|-----------|-----------|
| 1  | 6 | 0 | -3.519165 | 1.057582  | 0.246202  |
| 2  | 6 | 0 | -4.862964 | 1.040910  | 0.235065  |
| 3  | 6 | 0 | -5.614338 | -0.051434 | -0.009879 |
| 4  | 6 | 0 | -4.842164 | -1.131493 | -0.244216 |
| 5  | 6 | 0 | -3.498127 | -1.125456 | -0.241198 |
| 6  | 6 | 0 | -2.754992 | -0.027216 | 0.005038  |
| 7  | 6 | 0 | -1.391655 | -0.014682 | 0.007279  |
| 8  | 6 | 0 | -0.669747 | 1.122253  | 0.007753  |
| 9  | 6 | 0 | 0.672887  | 1.220095  | 0.042127  |
| 10 | 6 | 0 | 1.282961  | 0.010157  | -0.003453 |
| 11 | 6 | 0 | 0.695996  | -1.211795 | -0.038122 |
| 12 | 6 | 0 | -0.647940 | -1.137574 | 0.007170  |
| 13 | 7 | 0 | 1.359899  | -2.324871 | -0.038725 |
| 14 | 7 | 0 | 1.314340  | 2.345924  | 0.046820  |
| 15 | 6 | 0 | 2.637761  | -2.376376 | 0.092195  |
| 16 | 6 | 0 | 3.127922  | -3.617494 | 0.141282  |
| 17 | 6 | 0 | 2.056329  | -4.391019 | -0.018930 |
| 18 | 6 | 0 | 0.999603  | -3.563807 | -0.141875 |
| 19 | 6 | 0 | 0.930507  | 3.574975  | 0.175591  |
| 20 | 6 | 0 | 1.966241  | 4.427438  | 0.045661  |
| 21 | 6 | 0 | 3.050299  | 3.678304  | -0.146669 |
| 22 | 6 | 0 | 2.588041  | 2.426288  | -0.105291 |
| 23 | 5 | 0 | 2.869174  | 0.026837  | -0.023874 |
| 24 | 6 | 0 | 3.534280  | -1.392111 | 0.206050  |
| 25 | 6 | 0 | 4.835400  | -1.643868 | 0.413565  |
| 26 | 6 | 0 | 5.317156  | -2.901153 | 0.477998  |
| 27 | 6 | 0 | 4.424641  | -3.898975 | 0.320818  |
| 28 | 6 | 0 | 2.007124  | -5.728452 | -0.061114 |
| 29 | 6 | 0 | 0.836181  | -6.358693 | -0.258093 |
| 30 | 6 | 0 | -0.231335 | -5.558326 | -0.429444 |
| 31 | 6 | 0 | -0.155058 | -4.215731 | -0.382006 |
| 32 | 6 | 0 | 4.337461  | 3.987839  | -0.347593 |
| 33 | 6 | 0 | 5.246444  | 3.010615  | -0.537282 |
| 34 | 6 | 0 | 4.792246  | 1.742735  | -0.479764 |
| 35 | 6 | 0 | 3.501196  | 1.461467  | -0.249117 |
| 36 | 6 | 0 | -0.233759 | 4.194389  | 0.452051  |
| 37 | 6 | 0 | -0.335135 | 5.533503  | 0.523750  |
| 38 | 6 | 0 | 0.709990  | 6.361722  | 0.344080  |
| 39 | 6 | 0 | 1.890692  | 5.763459  | 0.111161  |
| 40 | 6 | 0 | 6.719908  | 3.356882  | -0.785814 |
| 41 | 6 | 0 | 6.833053  | 4.196145  | -2.077359 |
| 42 | 6 | 0 | 7.265136  | 4.167559  | 0.410898  |
| 43 | 6 | 0 | 7.636410  | 2.122556  | -0.955174 |
| 44 | 6 | 0 | 0.538840  | 7.881570  | 0.443413  |

|    |   |   |            |           |           |
|----|---|---|------------|-----------|-----------|
| 45 | 6 | 0 | 0.059018   | 8.248818  | 1.864755  |
| 46 | 6 | 0 | 1.838419   | 8.674609  | 0.175087  |
| 47 | 6 | 0 | -0.504837  | 8.350073  | -0.594812 |
| 48 | 6 | 0 | 6.802464   | -3.213818 | 0.698706  |
| 49 | 6 | 0 | 7.697626   | -1.959141 | 0.827040  |
| 50 | 6 | 0 | 6.961303   | -4.029543 | 2.000435  |
| 51 | 6 | 0 | 7.337029   | -4.033122 | -0.497216 |
| 52 | 6 | 0 | 0.769740   | -7.888915 | -0.312363 |
| 53 | 6 | 0 | 1.640443   | -8.395630 | -1.483070 |
| 54 | 6 | 0 | 1.298529   | -8.471412 | 1.017376  |
| 55 | 6 | 0 | -0.656684  | -8.446723 | -0.520937 |
| 56 | 7 | 0 | -6.903887  | -0.061739 | -0.018991 |
| 57 | 6 | 0 | -7.671382  | -1.079947 | 0.185230  |
| 58 | 6 | 0 | -8.966364  | -0.730901 | 0.094017  |
| 59 | 6 | 0 | -8.974500  | 0.575491  | -0.164422 |
| 60 | 6 | 0 | -7.683711  | 0.944490  | -0.235357 |
| 61 | 6 | 0 | -7.452394  | -2.357111 | 0.559137  |
| 62 | 6 | 0 | -8.463335  | -3.228508 | 0.723070  |
| 63 | 6 | 0 | -9.737996  | -2.847207 | 0.556896  |
| 64 | 6 | 0 | -9.999704  | -1.568560 | 0.253253  |
| 65 | 6 | 0 | -10.017975 | 1.396951  | -0.340686 |
| 66 | 6 | 0 | -9.771352  | 2.679347  | -0.640938 |
| 67 | 6 | 0 | -8.500210  | 3.080368  | -0.786890 |
| 68 | 6 | 0 | -7.478717  | 2.224834  | -0.606620 |
| 69 | 1 | 0 | -3.083807  | 2.027857  | 0.532592  |
| 70 | 1 | 0 | -5.320819  | 1.986450  | 0.556780  |
| 71 | 1 | 0 | -5.280205  | -2.084779 | -0.570647 |
| 72 | 1 | 0 | -3.043512  | -2.087993 | -0.523884 |
| 73 | 1 | 0 | -1.232268  | 2.039999  | -0.113821 |
| 74 | 1 | 0 | -1.194673  | -2.063935 | 0.131587  |
| 75 | 1 | 0 | 5.508780   | -0.789155 | 0.528108  |
| 76 | 1 | 0 | 4.749201   | -4.948893 | 0.353848  |
| 77 | 1 | 0 | 2.933283   | -6.308888 | 0.059035  |
| 78 | 1 | 0 | -1.221511  | -5.994182 | -0.635838 |
| 79 | 1 | 0 | -1.110396  | -3.724873 | -0.596035 |
| 80 | 1 | 0 | 4.640727   | 5.044291  | -0.372665 |
| 81 | 1 | 0 | 5.480045   | 0.903284  | -0.619915 |
| 82 | 1 | 0 | -1.172331  | 3.678504  | 0.681652  |
| 83 | 1 | 0 | -1.324912  | 5.958116  | 0.760970  |
| 84 | 1 | 0 | 2.807947   | 6.352682  | -0.018713 |
| 85 | 1 | 0 | 7.893391   | 4.447923  | -2.305982 |
| 86 | 1 | 0 | 6.423458   | 3.639071  | -2.950622 |
| 87 | 1 | 0 | 6.286695   | 5.162633  | -2.009844 |
| 88 | 1 | 0 | 8.343682   | 4.410583  | 0.278606  |

|     |   |   |            |           |           |
|-----|---|---|------------|-----------|-----------|
| 89  | 1 | 0 | 7.163816   | 3.592470  | 1.359581  |
| 90  | 1 | 0 | 6.740394   | 5.138249  | 0.549091  |
| 91  | 1 | 0 | 7.342069   | 1.501174  | -1.831115 |
| 92  | 1 | 0 | 8.693579   | 2.425141  | -1.130930 |
| 93  | 1 | 0 | 7.643356   | 1.480743  | -0.044934 |
| 94  | 1 | 0 | -0.050666  | 9.350559  | 1.983630  |
| 95  | 1 | 0 | -0.930276  | 7.804227  | 2.111240  |
| 96  | 1 | 0 | 0.785506   | 7.898068  | 2.632968  |
| 97  | 1 | 0 | 1.663361   | 9.772419  | 0.241466  |
| 98  | 1 | 0 | 2.238337   | 8.480963  | -0.846135 |
| 99  | 1 | 0 | 2.631060   | 8.441878  | 0.921624  |
| 100 | 1 | 0 | -0.193193  | 8.068774  | -1.626607 |
| 101 | 1 | 0 | -1.513278  | 7.915619  | -0.418418 |
| 102 | 1 | 0 | -0.632046  | 9.456043  | -0.571800 |
| 103 | 1 | 0 | 8.764499   | -2.237802 | 0.982404  |
| 104 | 1 | 0 | 7.670291   | -1.332061 | -0.093036 |
| 105 | 1 | 0 | 7.411532   | -1.329623 | 1.699939  |
| 106 | 1 | 0 | 8.031370   | -4.256269 | 2.209107  |
| 107 | 1 | 0 | 6.433122   | -5.007545 | 1.960500  |
| 108 | 1 | 0 | 6.560156   | -3.466323 | 2.873717  |
| 109 | 1 | 0 | 6.829937   | -5.016775 | -0.607257 |
| 110 | 1 | 0 | 7.201814   | -3.476272 | -1.452441 |
| 111 | 1 | 0 | 8.423311   | -4.251754 | -0.386323 |
| 112 | 1 | 0 | 1.596251   | -9.504841 | -1.570579 |
| 113 | 1 | 0 | 1.293840   | -7.967323 | -2.451099 |
| 114 | 1 | 0 | 2.714217   | -8.130588 | -1.364481 |
| 115 | 1 | 0 | 1.237257   | -9.583190 | 1.026391  |
| 116 | 1 | 0 | 0.704160   | -8.094722 | 1.880890  |
| 117 | 1 | 0 | 2.364228   | -8.215315 | 1.206374  |
| 118 | 1 | 0 | -1.093447  | -8.121937 | -1.492262 |
| 119 | 1 | 0 | -0.656912  | -9.560211 | -0.538021 |
| 120 | 1 | 0 | -1.343800  | -8.144829 | 0.301726  |
| 121 | 1 | 0 | -6.461672  | -2.759826 | 0.806678  |
| 122 | 1 | 0 | -8.250431  | -4.266789 | 1.031764  |
| 123 | 1 | 0 | -10.561345 | -3.564637 | 0.709416  |
| 124 | 1 | 0 | -11.043581 | -1.232175 | 0.156154  |
| 125 | 1 | 0 | -11.058000 | 1.044481  | -0.260460 |
| 126 | 1 | 0 | -10.603120 | 3.383915  | -0.807174 |
| 127 | 1 | 0 | -8.298529  | 4.121667  | -1.092818 |
| 128 | 1 | 0 | -6.490687  | 2.642969  | -0.839029 |

-----  
**Table S6.** Cartesian coordinates of **PhCzBN** at the optimized  $S_1$  geometry.



| Center<br>Number | Atomic<br>Number | Atomic<br>Type | Coordinates (Angstroms) |           |           |
|------------------|------------------|----------------|-------------------------|-----------|-----------|
|                  |                  |                | X                       | Y         | Z         |
| 1                | 6                | 0              | -3.581096               | 1.056024  | 0.528445  |
| 2                | 6                | 0              | -4.969037               | 1.045950  | 0.536333  |
| 3                | 6                | 0              | -5.669393               | -0.041666 | -0.001408 |
| 4                | 6                | 0              | -4.952259               | -1.118700 | -0.538232 |
| 5                | 6                | 0              | -3.564292               | -1.107920 | -0.528880 |
| 6                | 6                | 0              | -2.840989               | -0.020360 | -0.000040 |
| 7                | 6                | 0              | -1.372497               | -0.009078 | 0.000242  |
| 8                | 6                | 0              | -0.656201               | 1.195113  | -0.076937 |
| 9                | 6                | 0              | 0.747207                | 1.212332  | 0.012019  |
| 10               | 6                | 0              | 1.513979                | 0.012625  | -0.001744 |
| 11               | 6                | 0              | 0.765016                | -1.198328 | -0.014244 |
| 12               | 6                | 0              | -0.637640               | -1.203029 | 0.077105  |
| 13               | 7                | 0              | 1.472982                | -2.404187 | -0.057868 |
| 14               | 7                | 0              | 1.436287                | 2.428359  | 0.054227  |
| 15               | 6                | 0              | 2.868021                | -2.452283 | 0.131968  |
| 16               | 6                | 0              | 3.295100                | -3.786752 | 0.209431  |
| 17               | 6                | 0              | 2.119159                | -4.610408 | 0.001364  |
| 18               | 6                | 0              | 1.013307                | -3.732606 | -0.202538 |
| 19               | 6                | 0              | 0.957898                | 3.750616  | 0.197155  |
| 20               | 6                | 0              | 2.048726                | 4.642678  | -0.004879 |
| 21               | 6                | 0              | 3.236904                | 3.837643  | -0.212347 |
| 22               | 6                | 0              | 2.830344                | 2.496544  | -0.135725 |
| 23               | 5                | 0              | 3.049263                | 0.024177  | -0.002561 |
| 24               | 6                | 0              | 3.719670                | -1.341661 | 0.185432  |
| 25               | 6                | 0              | 5.083463                | -1.661988 | 0.395001  |
| 26               | 6                | 0              | 5.560577                | -2.977604 | 0.506483  |
| 27               | 6                | 0              | 4.653054                | -4.051518 | 0.402625  |
| 28               | 6                | 0              | 1.943922                | -5.985342 | -0.081566 |
| 29               | 6                | 0              | 0.687940                | -6.532477 | -0.393661 |
| 30               | 6                | 0              | -0.369979               | -5.645109 | -0.651847 |
| 31               | 6                | 0              | -0.224424               | -4.257942 | -0.573845 |
| 32               | 6                | 0              | 4.590959                | 4.122638  | -0.405151 |
| 33               | 6                | 0              | 5.514939                | 3.062547  | -0.509499 |
| 34               | 6                | 0              | 5.058294                | 1.740239  | -0.398931 |
| 35               | 6                | 0              | 3.698705                | 1.399132  | -0.189830 |
| 36               | 6                | 0              | -0.290599               | 4.259355  | 0.567179  |
| 37               | 6                | 0              | -0.450457               | 5.640057  | 0.644579  |
| 38               | 6                | 0              | 0.598336                | 6.546681  | 0.386700  |
| 39               | 6                | 0              | 1.857744                | 6.020507  | 0.076487  |
| 40               | 6                | 0              | 6.999270                | 3.392297  | -0.726499 |

|    |   |   |            |           |           |
|----|---|---|------------|-----------|-----------|
| 41 | 6 | 0 | 7.158831   | 4.181038  | -2.044540 |
| 42 | 6 | 0 | 7.507645   | 4.252305  | 0.451388  |
| 43 | 6 | 0 | 7.877928   | 2.132779  | -0.812011 |
| 44 | 6 | 0 | 0.332193   | 8.053732  | 0.481224  |
| 45 | 6 | 0 | -0.136580  | 8.403692  | 1.910793  |
| 46 | 6 | 0 | 1.585261   | 8.887225  | 0.168033  |
| 47 | 6 | 0 | -0.770290  | 8.439170  | -0.529546 |
| 48 | 6 | 0 | 7.049741   | -3.284106 | 0.723755  |
| 49 | 6 | 0 | 7.908947   | -2.011095 | 0.807470  |
| 50 | 6 | 0 | 7.221364   | -4.068500 | 2.042912  |
| 51 | 6 | 0 | 7.571164   | -4.137858 | -0.453014 |
| 52 | 6 | 0 | 0.526465   | -8.055693 | -0.468140 |
| 53 | 6 | 0 | 1.471197   | -8.617580 | -1.553277 |
| 54 | 6 | 0 | 0.893344   | -8.671074 | 0.900307  |
| 55 | 6 | 0 | -0.910635  | -8.476434 | -0.815375 |
| 56 | 7 | 0 | -7.082910  | -0.052119 | -0.002293 |
| 57 | 6 | 0 | -7.892991  | -1.082981 | 0.487946  |
| 58 | 6 | 0 | -9.253410  | -0.721187 | 0.309112  |
| 59 | 6 | 0 | -9.262592  | 0.584962  | -0.316680 |
| 60 | 6 | 0 | -7.907408  | 0.966720  | -0.493673 |
| 61 | 6 | 0 | -7.528118  | -2.281377 | 1.103920  |
| 62 | 6 | 0 | -8.550578  | -3.130422 | 1.521527  |
| 63 | 6 | 0 | -9.902692  | -2.795977 | 1.337768  |
| 64 | 6 | 0 | -10.259750 | -1.592379 | 0.737136  |
| 65 | 6 | 0 | -10.281061 | 1.441249  | -0.746105 |
| 66 | 6 | 0 | -9.940922  | 2.649949  | -1.346303 |
| 67 | 6 | 0 | -8.593623  | 3.004237  | -1.528245 |
| 68 | 6 | 0 | -7.559352  | 2.170337  | -1.109212 |
| 69 | 1 | 0 | -3.059605  | 1.890082  | 0.986485  |
| 70 | 1 | 0 | -5.521775  | 1.865812  | 0.981516  |
| 71 | 1 | 0 | -5.492138  | -1.946813 | -0.983928 |
| 72 | 1 | 0 | -3.029908  | -1.934145 | -0.986266 |
| 73 | 1 | 0 | -1.197654  | 2.110264  | -0.253133 |
| 74 | 1 | 0 | -1.164908  | -2.126220 | 0.254593  |
| 75 | 1 | 0 | 5.781894   | -0.842915 | 0.484656  |
| 76 | 1 | 0 | 5.002081   | -5.076619 | 0.463333  |
| 77 | 1 | 0 | 2.797070   | -6.635168 | 0.083596  |
| 78 | 1 | 0 | -1.339605  | -6.031196 | -0.938399 |
| 79 | 1 | 0 | -1.060520  | -3.631620 | -0.848436 |
| 80 | 1 | 0 | 4.924530   | 5.152911  | -0.465471 |
| 81 | 1 | 0 | 5.768973   | 0.931829  | -0.489393 |
| 82 | 1 | 0 | -1.118798  | 3.621711  | 0.839697  |
| 83 | 1 | 0 | -1.424573  | 6.020692  | 0.931392  |
| 84 | 1 | 0 | 2.704513   | 6.674801  | -0.090164 |

|     |   |   |            |           |           |
|-----|---|---|------------|-----------|-----------|
| 85  | 1 | 0 | 8.211894   | 4.430919  | -2.214979 |
| 86  | 1 | 0 | 6.804937   | 3.589517  | -2.894541 |
| 87  | 1 | 0 | 6.590830   | 5.115247  | -2.028129 |
| 88  | 1 | 0 | 8.566005   | 4.499949  | 0.313678  |
| 89  | 1 | 0 | 7.402072   | 3.712830  | 1.397687  |
| 90  | 1 | 0 | 6.952854   | 5.190547  | 0.537913  |
| 91  | 1 | 0 | 7.585839   | 1.491479  | -1.649252 |
| 92  | 1 | 0 | 8.921901   | 2.423712  | -0.964114 |
| 93  | 1 | 0 | 7.828212   | 1.540344  | 0.106837  |
| 94  | 1 | 0 | -0.331990  | 9.478244  | 1.993491  |
| 95  | 1 | 0 | -1.056096  | 7.875633  | 2.177482  |
| 96  | 1 | 0 | 0.628555   | 8.136873  | 2.646212  |
| 97  | 1 | 0 | 1.344607   | 9.952310  | 0.236573  |
| 98  | 1 | 0 | 1.956680   | 8.694896  | -0.843337 |
| 99  | 1 | 0 | 2.394356   | 8.684559  | 0.876613  |
| 100 | 1 | 0 | -0.459503  | 8.202866  | -1.551860 |
| 101 | 1 | 0 | -1.704775  | 7.906838  | -0.332250 |
| 102 | 1 | 0 | -0.977978  | 9.513164  | -0.473770 |
| 103 | 1 | 0 | 8.957233   | -2.285857 | 0.959866  |
| 104 | 1 | 0 | 7.850199   | -1.420681 | -0.112128 |
| 105 | 1 | 0 | 7.607234   | -1.373227 | 1.643901  |
| 106 | 1 | 0 | 8.278192   | -4.301631 | 2.213630  |
| 107 | 1 | 0 | 6.668057   | -5.011512 | 2.027741  |
| 108 | 1 | 0 | 6.858311   | -3.481433 | 2.892121  |
| 109 | 1 | 0 | 7.031166   | -5.084826 | -0.538031 |
| 110 | 1 | 0 | 7.457098   | -3.601540 | -1.400105 |
| 111 | 1 | 0 | 8.633260   | -4.368677 | -0.315034 |
| 112 | 1 | 0 | 1.371030   | -9.706460 | -1.616820 |
| 113 | 1 | 0 | 1.232406   | -8.193568 | -2.533409 |
| 114 | 1 | 0 | 2.518510   | -8.390383 | -1.336479 |
| 115 | 1 | 0 | 0.790765   | -9.761044 | 0.866110  |
| 116 | 1 | 0 | 0.235238   | -8.289415 | 1.686919  |
| 117 | 1 | 0 | 1.923554   | -8.440543 | 1.184977  |
| 118 | 1 | 0 | -1.217570  | -8.101189 | -1.796584 |
| 119 | 1 | 0 | -0.976555  | -9.568155 | -0.843913 |
| 120 | 1 | 0 | -1.628238  | -8.119901 | -0.069885 |
| 121 | 1 | 0 | -6.486867  | -2.538806 | 1.258878  |
| 122 | 1 | 0 | -8.293622  | -4.069237 | 2.002396  |
| 123 | 1 | 0 | -10.674036 | -3.481826 | 1.672930  |
| 124 | 1 | 0 | -11.304859 | -1.328543 | 0.605861  |
| 125 | 1 | 0 | -11.322355 | 1.162077  | -0.616241 |
| 126 | 1 | 0 | -10.721808 | 3.324376  | -1.682549 |
| 127 | 1 | 0 | -8.349841  | 3.946705  | -2.008825 |
| 128 | 1 | 0 | -6.521800  | 2.443070  | -1.262795 |

-----  
**Table S7.** Cartesian coordinates of the model compound **PhCzBN-2IsCz** at the optimized  $S_0$  geometry.

-----

| Center<br>Number | Atomic<br>Number | Atomic<br>Type | Coordinates (Angstroms) |           |           |
|------------------|------------------|----------------|-------------------------|-----------|-----------|
|                  |                  |                | X                       | Y         | Z         |
| 1                | 6                | 0              | 1.353760                | 0.793900  | 0.747180  |
| 2                | 6                | 0              | 0.010348                | 0.814077  | 0.728283  |
| 3                | 6                | 0              | -0.762224               | -0.075803 | 0.073814  |
| 4                | 6                | 0              | -0.010656               | -1.003479 | -0.552735 |
| 5                | 6                | 0              | 1.333308                | -1.031816 | -0.545010 |
| 6                | 6                | 0              | 2.097037                | -0.127233 | 0.101013  |
| 7                | 6                | 0              | 3.460325                | -0.137816 | 0.097008  |
| 8                | 6                | 0              | 4.199383                | 0.905243  | 0.520356  |
| 9                | 6                | 0              | 5.543419                | 0.968082  | 0.569876  |
| 10               | 6                | 0              | 6.134369                | -0.140622 | 0.060196  |
| 11               | 6                | 0              | 5.528487                | -1.251739 | -0.427031 |
| 12               | 6                | 0              | 4.186005                | -1.184942 | -0.339833 |
| 13               | 7                | 0              | 6.176067                | -2.287193 | -0.861043 |
| 14               | 7                | 0              | 6.201138                | 2.002683  | 0.989354  |
| 15               | 6                | 0              | 7.454724                | -2.395525 | -0.781594 |
| 16               | 6                | 0              | 7.928056                | -3.565530 | -1.217439 |
| 17               | 6                | 0              | 6.843498                | -4.211024 | -1.640767 |
| 18               | 6                | 0              | 5.796946                | -3.391098 | -1.420704 |
| 19               | 6                | 0              | 5.836376                | 3.095049  | 1.578947  |
| 20               | 6                | 0              | 6.881938                | 3.925684  | 1.761095  |
| 21               | 6                | 0              | 7.952628                | 3.295627  | 1.281369  |
| 22               | 6                | 0              | 7.473570                | 2.123836  | 0.856371  |
| 23               | 5                | 0              | 7.720423                | -0.132072 | 0.024705  |
| 24               | 6                | 0              | 8.367240                | -1.536470 | -0.317795 |
| 25               | 6                | 0              | 9.667280                | -1.858649 | -0.245416 |
| 26               | 6                | 0              | 10.132030               | -3.048992 | -0.674229 |
| 27               | 6                | 0              | 9.223003                | -3.904653 | -1.182661 |
| 28               | 6                | 0              | 6.775605                | -5.431238 | -2.188175 |
| 29               | 6                | 0              | 5.593610                | -5.930267 | -2.589115 |
| 30               | 6                | 0              | 4.534723                | -5.117556 | -2.422585 |
| 31               | 6                | 0              | 4.630153                | -3.894848 | -1.868945 |
| 32               | 6                | 0              | 9.241053                | 3.648047  | 1.187603  |
| 33               | 6                | 0              | 10.132895               | 2.807095  | 0.626599  |
| 34               | 6                | 0              | 9.661844                | 1.614260  | 0.211500  |
| 35               | 6                | 0              | 8.370419                | 1.276852  | 0.343098  |
| 36               | 6                | 0              | 4.684621                | 3.572413  | 2.089878  |
| 37               | 6                | 0              | 4.602266                | 4.786744  | 2.661997  |

|    |   |   |           |           |           |
|----|---|---|-----------|-----------|-----------|
| 38 | 6 | 0 | 5.655759  | 5.614483  | 2.787408  |
| 39 | 6 | 0 | 6.825113  | 5.139236  | 2.325786  |
| 40 | 6 | 0 | 11.607091 | 3.210861  | 0.497996  |
| 41 | 6 | 0 | 11.711987 | 4.472868  | -0.386134 |
| 42 | 6 | 0 | 12.181586 | 3.509134  | 1.900657  |
| 43 | 6 | 0 | 12.503792 | 2.123948  | -0.139801 |
| 44 | 6 | 0 | 5.505774  | 6.986787  | 3.453243  |
| 45 | 6 | 0 | 5.052218  | 6.796779  | 4.917242  |
| 46 | 6 | 0 | 6.811302  | 7.814251  | 3.477107  |
| 47 | 6 | 0 | 4.452829  | 7.817589  | 2.686385  |
| 48 | 6 | 0 | 11.615838 | -3.433457 | -0.617806 |
| 49 | 6 | 0 | 12.530051 | -2.329019 | -0.037649 |
| 50 | 6 | 0 | 11.782437 | -4.685444 | 0.270810  |
| 51 | 6 | 0 | 12.121207 | -3.737900 | -2.045652 |
| 52 | 6 | 0 | 5.505657  | -7.323591 | -3.221420 |
| 53 | 6 | 0 | 6.352015  | -7.350855 | -4.513126 |
| 54 | 6 | 0 | 6.046351  | -8.372983 | -2.224679 |
| 55 | 6 | 0 | 4.068986  | -7.749923 | -3.600057 |
| 56 | 7 | 0 | -2.051206 | -0.043266 | 0.049341  |
| 57 | 6 | 0 | -2.848298 | -1.033367 | -0.180150 |
| 58 | 6 | 0 | -4.129032 | -0.633952 | -0.142985 |
| 59 | 6 | 0 | -4.098954 | 0.666116  | 0.140088  |
| 60 | 6 | 0 | -2.800722 | 0.990986  | 0.243538  |
| 61 | 6 | 0 | -2.691138 | -2.360737 | -0.353453 |
| 62 | 6 | 0 | -3.739886 | -3.177162 | -0.562110 |
| 63 | 6 | 0 | -5.009772 | -2.733556 | -0.570175 |
| 64 | 6 | 0 | -5.190747 | -1.421673 | -0.350684 |
| 65 | 6 | 0 | -5.123023 | 1.514617  | 0.290076  |
| 66 | 6 | 0 | -4.878241 | 2.814788  | 0.517844  |
| 67 | 6 | 0 | -3.586470 | 3.182581  | 0.588354  |
| 68 | 6 | 0 | -2.577655 | 2.307150  | 0.429767  |
| 69 | 7 | 0 | -5.192866 | 8.363197  | -2.244670 |
| 70 | 6 | 0 | -5.472129 | 7.458932  | -1.393202 |
| 71 | 6 | 0 | -5.095456 | 6.290433  | -1.929186 |
| 72 | 6 | 0 | -4.586136 | 6.572302  | -3.135668 |
| 73 | 6 | 0 | -4.660692 | 7.906405  | -3.308710 |
| 74 | 6 | 0 | -6.031048 | 7.479407  | -0.176051 |
| 75 | 6 | 0 | -6.189763 | 6.316878  | 0.479942  |
| 76 | 6 | 0 | -5.791055 | 5.137962  | -0.039710 |
| 77 | 6 | 0 | -5.256121 | 5.133299  | -1.276649 |
| 78 | 6 | 0 | -4.074355 | 5.750964  | -4.061746 |
| 79 | 6 | 0 | -3.620880 | 6.289385  | -5.204296 |
| 80 | 6 | 0 | -3.686930 | 7.617181  | -5.395907 |
| 81 | 6 | 0 | -4.203470 | 8.429062  | -4.456836 |

|     |   |   |           |            |           |
|-----|---|---|-----------|------------|-----------|
| 82  | 6 | 0 | -5.501917 | 9.775062   | -1.917683 |
| 83  | 6 | 0 | -5.177416 | 10.933832  | -2.865617 |
| 84  | 7 | 0 | -7.370408 | -3.459674  | -2.748212 |
| 85  | 6 | 0 | -8.152734 | -2.958840  | -1.883298 |
| 86  | 6 | 0 | -6.263150 | -3.914100  | -2.335029 |
| 87  | 6 | 0 | -6.168941 | -3.684231  | -0.815652 |
| 88  | 6 | 0 | -7.541691 | -3.055889  | -0.692916 |
| 89  | 7 | 0 | -7.413100 | 3.578580   | 2.476362  |
| 90  | 6 | 0 | -8.124458 | 3.181990   | 1.502723  |
| 91  | 6 | 0 | -6.238771 | 3.972604   | 2.214345  |
| 92  | 6 | 0 | -5.994220 | 3.828549   | 0.701766  |
| 93  | 6 | 0 | -7.379717 | 3.301207   | 0.393205  |
| 94  | 6 | 0 | -8.141417 | -2.609311  | 0.420410  |
| 95  | 6 | 0 | -9.359926 | -2.053190  | 0.320604  |
| 96  | 6 | 0 | -9.967728 | -1.952075  | -0.873840 |
| 97  | 6 | 0 | -9.370244 | -2.407477  | -1.987968 |
| 98  | 6 | 0 | -7.875584 | 2.953290   | -0.803209 |
| 99  | 6 | 0 | -9.129915 | 2.477718   | -0.869710 |
| 100 | 6 | 0 | -9.873696 | 2.357014   | 0.243308  |
| 101 | 6 | 0 | -9.377950 | 2.711004   | 1.441118  |
| 102 | 6 | 0 | -7.748704 | -3.507627  | -4.172797 |
| 103 | 6 | 0 | -7.944404 | 3.575157   | 3.852032  |
| 104 | 8 | 0 | -5.415512 | 4.393197   | 2.995405  |
| 105 | 8 | 0 | -5.398280 | -4.444096  | -2.995243 |
| 106 | 7 | 0 | -6.015218 | -8.032807  | 2.516914  |
| 107 | 6 | 0 | -5.545947 | -7.507662  | 3.577895  |
| 108 | 6 | 0 | -5.344690 | -6.208662  | 3.310111  |
| 109 | 6 | 0 | -5.721705 | -6.019516  | 2.038638  |
| 110 | 6 | 0 | -6.146249 | -7.202737  | 1.559345  |
| 111 | 6 | 0 | -5.254063 | -7.997986  | 4.791588  |
| 112 | 6 | 0 | -4.759880 | -7.161422  | 5.720605  |
| 113 | 6 | 0 | -4.561210 | -5.860762  | 5.443774  |
| 114 | 6 | 0 | -4.853021 | -5.367243  | 4.228667  |
| 115 | 6 | 0 | -5.718378 | -4.902612  | 1.300893  |
| 116 | 6 | 0 | -6.135630 | -4.949127  | 0.022095  |
| 117 | 6 | 0 | -6.581688 | -6.128686  | -0.451567 |
| 118 | 6 | 0 | -6.584076 | -7.248026  | 0.293239  |
| 119 | 6 | 0 | -6.341902 | -9.478218  | 2.513510  |
| 120 | 6 | 0 | -6.907461 | -10.193964 | 1.282860  |
| 121 | 1 | 0 | 1.807247  | 1.566887   | 1.387312  |
| 122 | 1 | 0 | -0.428917 | 1.572507   | 1.389932  |
| 123 | 1 | 0 | -0.463538 | -1.747586  | -1.221478 |
| 124 | 1 | 0 | 1.771092  | -1.821391  | -1.175857 |
| 125 | 1 | 0 | 3.650868  | 1.808324   | 0.760130  |

|     |   |   |           |           |           |
|-----|---|---|-----------|-----------|-----------|
| 126 | 1 | 0 | 3.623651  | -2.080149 | -0.573530 |
| 127 | 1 | 0 | 10.354088 | -1.117386 | 0.174163  |
| 128 | 1 | 0 | 9.532965  | -4.890349 | -1.558188 |
| 129 | 1 | 0 | 7.695302  | -6.020347 | -2.314868 |
| 130 | 1 | 0 | 3.535857  | -5.435216 | -2.760529 |
| 131 | 1 | 0 | 3.677982  | -3.354174 | -1.861445 |
| 132 | 1 | 0 | 9.558804  | 4.633963  | 1.555895  |
| 133 | 1 | 0 | 10.335873 | 0.884122  | -0.246810 |
| 134 | 1 | 0 | 3.743083  | 3.013852  | 2.125967  |
| 135 | 1 | 0 | 3.621763  | 5.097793  | 3.059581  |
| 136 | 1 | 0 | 7.748387  | 5.727486  | 2.410468  |
| 137 | 1 | 0 | 12.772037 | 4.784574  | -0.524358 |
| 138 | 1 | 0 | 11.281185 | 4.287312  | -1.396592 |
| 139 | 1 | 0 | 11.180148 | 5.347077  | 0.049749  |
| 140 | 1 | 0 | 13.261387 | 3.775957  | 1.848553  |
| 141 | 1 | 0 | 12.086250 | 2.620931  | 2.566176  |
| 142 | 1 | 0 | 11.672881 | 4.361141  | 2.402797  |
| 143 | 1 | 0 | 12.187868 | 1.879051  | -1.179122 |
| 144 | 1 | 0 | 13.562262 | 2.462861  | -0.209307 |
| 145 | 1 | 0 | 12.515479 | 1.187325  | 0.462800  |
| 146 | 1 | 0 | 4.958358  | 7.774043  | 5.442663  |
| 147 | 1 | 0 | 4.061310  | 6.298126  | 4.997554  |
| 148 | 1 | 0 | 5.785801  | 6.179013  | 5.484023  |
| 149 | 1 | 0 | 6.651632  | 8.808184  | 3.953366  |
| 150 | 1 | 0 | 7.193184  | 8.014905  | 2.450369  |
| 151 | 1 | 0 | 7.611995  | 7.313397  | 4.066945  |
| 152 | 1 | 0 | 4.745275  | 7.942209  | 1.618839  |
| 153 | 1 | 0 | 3.441443  | 7.355440  | 2.705698  |
| 154 | 1 | 0 | 4.340526  | 8.834935  | 3.125115  |
| 155 | 1 | 0 | 13.595124 | -2.653647 | -0.020295 |
| 156 | 1 | 0 | 12.497904 | -1.398315 | -0.648580 |
| 157 | 1 | 0 | 12.265518 | -2.077811 | 1.014465  |
| 158 | 1 | 0 | 12.852065 | -4.982864 | 0.356307  |
| 159 | 1 | 0 | 11.239631 | -5.570095 | -0.129118 |
| 160 | 1 | 0 | 11.402555 | -4.495608 | 1.300572  |
| 161 | 1 | 0 | 11.598370 | -4.600836 | -2.513423 |
| 162 | 1 | 0 | 11.980223 | -2.857304 | -2.713131 |
| 163 | 1 | 0 | 13.205591 | -3.990616 | -2.047030 |
| 164 | 1 | 0 | 6.292057  | -8.342371 | -5.016233 |
| 165 | 1 | 0 | 5.996575  | -6.583398 | -5.237893 |
| 166 | 1 | 0 | 7.430805  | -7.157968 | -4.322832 |
| 167 | 1 | 0 | 5.970037  | -9.403638 | -2.639114 |
| 168 | 1 | 0 | 5.469893  | -8.350243 | -1.271707 |
| 169 | 1 | 0 | 7.117996  | -8.215851 | -1.972451 |

|     |   |   |            |            |           |
|-----|---|---|------------|------------|-----------|
| 170 | 1 | 0 | 3.622237   | -7.076108  | -4.365671 |
| 171 | 1 | 0 | 4.053517   | -8.772579  | -4.040537 |
| 172 | 1 | 0 | 3.398264   | -7.780068  | -2.711648 |
| 173 | 1 | 0 | -1.722266  | -2.872334  | -0.287094 |
| 174 | 1 | 0 | -3.552248  | -4.255570  | -0.703094 |
| 175 | 1 | 0 | -6.200565  | -0.990809  | -0.333714 |
| 176 | 1 | 0 | -6.154862  | 1.145121   | 0.217849  |
| 177 | 1 | 0 | -3.342887  | 4.246871   | 0.749970  |
| 178 | 1 | 0 | -1.580585  | 2.765438   | 0.417182  |
| 179 | 1 | 0 | -6.365319  | 8.419459   | 0.290453  |
| 180 | 1 | 0 | -6.665969  | 6.353035   | 1.473060  |
| 181 | 1 | 0 | -4.949582  | 4.189022   | -1.751804 |
| 182 | 1 | 0 | -4.020940  | 4.662815   | -3.901066 |
| 183 | 1 | 0 | -3.193137  | 5.639680   | -5.986318 |
| 184 | 1 | 0 | -3.310019  | 8.045726   | -6.340443 |
| 185 | 1 | 0 | -4.227228  | 9.502304   | -4.677857 |
| 186 | 1 | 0 | -6.600560  | 9.841953   | -1.717426 |
| 187 | 1 | 0 | -4.983741  | 10.018508  | -0.956465 |
| 188 | 1 | 0 | -5.482162  | 11.906859  | -2.413944 |
| 189 | 1 | 0 | -4.083723  | 11.012803  | -3.059994 |
| 190 | 1 | 0 | -5.738254  | 10.851688  | -3.824110 |
| 191 | 1 | 0 | -7.637952  | -2.683628  | 1.396853  |
| 192 | 1 | 0 | -9.862201  | -1.671723  | 1.225566  |
| 193 | 1 | 0 | -10.967199 | -1.489804  | -0.939983 |
| 194 | 1 | 0 | -9.881690  | -2.319530  | -2.959317 |
| 195 | 1 | 0 | -7.261309  | 3.042570   | -1.712468 |
| 196 | 1 | 0 | -9.549692  | 2.178548   | -1.844815 |
| 197 | 1 | 0 | -10.900852 | 1.960974   | 0.172667  |
| 198 | 1 | 0 | -9.999264  | 2.605516   | 2.344267  |
| 199 | 1 | 0 | -6.970027  | -3.950445  | -4.830903 |
| 200 | 1 | 0 | -8.668660  | -4.121481  | -4.307716 |
| 201 | 1 | 0 | -7.939399  | -2.479670  | -4.557843 |
| 202 | 1 | 0 | -7.221833  | 3.938842   | 4.614394  |
| 203 | 1 | 0 | -8.840004  | 4.234197   | 3.922045  |
| 204 | 1 | 0 | -8.230540  | 2.541566   | 4.153813  |
| 205 | 1 | 0 | -5.408725  | -9.059053  | 5.041700  |
| 206 | 1 | 0 | -4.514010  | -7.547539  | 6.724495  |
| 207 | 1 | 0 | -4.154707  | -5.191727  | 6.220950  |
| 208 | 1 | 0 | -4.688907  | -4.301636  | 4.004736  |
| 209 | 1 | 0 | -5.378810  | -3.953477  | 1.742851  |
| 210 | 1 | 0 | -6.967366  | -6.197518  | -1.481844 |
| 211 | 1 | 0 | -6.960323  | -8.165018  | -0.174806 |
| 212 | 1 | 0 | -5.410304  | -10.034405 | 2.786320  |
| 213 | 1 | 0 | -7.078547  | -9.659154  | 3.335814  |



|     |   |   |           |            |          |
|-----|---|---|-----------|------------|----------|
| 214 | 1 | 0 | -7.073674 | -11.275077 | 1.500003 |
| 215 | 1 | 0 | -7.899871 | -9.783924  | 0.987645 |
| 216 | 1 | 0 | -6.200027 | -10.157190 | 0.423612 |

**Table S8.** Cartesian coordinates of **PhCzBN-2IsCz** at the optimized S<sub>1</sub> geometry.

| Center<br>Number | Atomic<br>Number | Atomic<br>Type | Coordinates (Angstroms) |           |           |
|------------------|------------------|----------------|-------------------------|-----------|-----------|
|                  |                  |                | X                       | Y         | Z         |
| 1                | 6                | 0              | -1.284425               | -0.631805 | 1.026702  |
| 2                | 6                | 0              | 0.103599                | -0.625509 | 1.033751  |
| 3                | 6                | 0              | 0.810344                | 0.001409  | -0.000648 |
| 4                | 6                | 0              | 0.100547                | 0.626530  | -1.033994 |
| 5                | 6                | 0              | -1.287522               | 0.629109  | -1.025050 |
| 6                | 6                | 0              | -2.016686               | -0.002493 | 0.001213  |
| 7                | 6                | 0              | -3.485905               | -0.004746 | 0.002180  |
| 8                | 6                | 0              | -4.208374               | -1.067263 | 0.564684  |
| 9                | 6                | 0              | -5.612660               | -1.028059 | 0.645527  |
| 10               | 6                | 0              | -6.371502               | -0.009310 | 0.003418  |
| 11               | 6                | 0              | -5.616037               | 1.011239  | -0.639851 |
| 12               | 6                | 0              | -4.212564               | 1.056071  | -0.560101 |
| 13               | 7                | 0              | -6.315919               | 2.018634  | -1.311199 |
| 14               | 7                | 0              | -6.308173               | -2.038167 | 1.316100  |
| 15               | 6                | 0              | -7.711109               | 2.166783  | -1.179123 |
| 16               | 6                | 0              | -8.129497               | 3.345592  | -1.814648 |
| 17               | 6                | 0              | -6.948476               | 3.931266  | -2.420119 |
| 18               | 6                | 0              | -5.847861               | 3.071479  | -2.129516 |
| 19               | 6                | 0              | -5.837134               | -3.093858 | 2.129646  |
| 20               | 6                | 0              | -6.933833               | -3.953041 | 2.422109  |
| 21               | 6                | 0              | -8.117649               | -3.368155 | 1.822834  |
| 22               | 6                | 0              | -7.703454               | -2.187593 | 1.187438  |
| 23               | 5                | 0              | -7.908079               | -0.010853 | 0.005086  |
| 24               | 6                | 0              | -8.569337               | 1.254093  | -0.552913 |
| 25               | 6                | 0              | -9.931309               | 1.644923  | -0.546216 |
| 26               | 6                | 0              | -10.399840              | 2.825879  | -1.143177 |
| 27               | 6                | 0              | -9.485956               | 3.680234  | -1.793130 |
| 28               | 6                | 0              | -6.764645               | 5.057455  | -3.211459 |
| 29               | 6                | 0              | -5.505186               | 5.353225  | -3.759561 |
| 30               | 6                | 0              | -4.452390               | 4.457361  | -3.509802 |
| 31               | 6                | 0              | -4.606670               | 3.317972  | -2.716437 |
| 32               | 6                | 0              | -9.473843               | -3.704611 | 1.805261  |
| 33               | 6                | 0              | -10.391602              | -2.850746 | 1.159580  |

|    |   |   |            |           |           |
|----|---|---|------------|-----------|-----------|
| 34 | 6 | 0 | -9.927399  | -1.668846 | 0.562492  |
| 35 | 6 | 0 | -8.565239  | -1.275980 | 0.564782  |
| 36 | 6 | 0 | -4.590718  | -3.342886 | 2.711841  |
| 37 | 6 | 0 | -4.438687  | -4.481277 | 3.498520  |
| 38 | 6 | 0 | -5.493706  | -5.382195 | 3.751071  |
| 39 | 6 | 0 | -6.750806  | -5.086940 | 3.211077  |
| 40 | 6 | 0 | -11.878193 | -3.237032 | 1.144304  |
| 41 | 6 | 0 | -12.044106 | -4.599486 | 0.436602  |
| 42 | 6 | 0 | -12.390813 | -3.347083 | 2.597027  |
| 43 | 6 | 0 | -12.749260 | -2.205338 | 0.407654  |
| 44 | 6 | 0 | -5.235978  | -6.620724 | 4.617490  |
| 45 | 6 | 0 | -4.762662  | -6.177372 | 6.019340  |
| 46 | 6 | 0 | -6.495400  | -7.485860 | 4.785923  |
| 47 | 6 | 0 | -4.140492  | -7.484789 | 3.954948  |
| 48 | 6 | 0 | -11.887022 | 3.209307  | -1.123091 |
| 49 | 6 | 0 | -12.753486 | 2.177084  | -0.381756 |
| 50 | 6 | 0 | -12.052811 | 4.572559  | -0.416824 |
| 51 | 6 | 0 | -12.404974 | 3.316247  | -2.574185 |
| 52 | 6 | 0 | -5.334131  | 6.609973  | -4.621700 |
| 53 | 6 | 0 | -6.276674  | 6.524768  | -5.842405 |
| 54 | 6 | 0 | -5.695255  | 7.854013  | -3.780400 |
| 55 | 6 | 0 | -3.894844  | 6.777214  | -5.134880 |
| 56 | 7 | 0 | 2.223182   | 0.003193  | -0.001585 |
| 57 | 6 | 0 | 3.040751   | 1.127253  | -0.174065 |
| 58 | 6 | 0 | 4.394893   | 0.720296  | -0.112777 |
| 59 | 6 | 0 | 4.396761   | -0.708564 | 0.107600  |
| 60 | 6 | 0 | 3.043692   | -1.118850 | 0.170156  |
| 61 | 6 | 0 | 2.699663   | 2.472412  | -0.340843 |
| 62 | 6 | 0 | 3.732054   | 3.393861  | -0.463671 |
| 63 | 6 | 0 | 5.089888   | 3.006305  | -0.418354 |
| 64 | 6 | 0 | 5.417039   | 1.664647  | -0.244500 |
| 65 | 6 | 0 | 5.421355   | -1.650390 | 0.238441  |
| 66 | 6 | 0 | 5.097648   | -2.992830 | 0.412684  |
| 67 | 6 | 0 | 3.740814   | -3.383726 | 0.459244  |
| 68 | 6 | 0 | 2.706051   | -2.464835 | 0.337289  |
| 69 | 7 | 0 | 5.802044   | -7.980145 | -3.560752 |
| 70 | 6 | 0 | 5.921939   | -7.184963 | -2.426626 |
| 71 | 6 | 0 | 5.568911   | -5.849585 | -2.756905 |
| 72 | 6 | 0 | 5.194455   | -5.853556 | -4.155683 |
| 73 | 6 | 0 | 5.338918   | -7.192893 | -4.610434 |
| 74 | 6 | 0 | 6.308629   | -7.529189 | -1.130556 |
| 75 | 6 | 0 | 6.354744   | -6.519096 | -0.173882 |
| 76 | 6 | 0 | 6.016245   | -5.187005 | -0.479252 |
| 77 | 6 | 0 | 5.621836   | -4.857298 | -1.777092 |

|     |   |   |           |            |           |
|-----|---|---|-----------|------------|-----------|
| 78  | 6 | 0 | 4.754601  | -4.867586  | -5.043142 |
| 79  | 6 | 0 | 4.459591  | -5.222385  | -6.356790 |
| 80  | 6 | 0 | 4.599794  | -6.551957  | -6.788390 |
| 81  | 6 | 0 | 5.037928  | -7.554538  | -5.925284 |
| 82  | 6 | 0 | 5.942975  | -9.423825  | -3.591692 |
| 83  | 6 | 0 | 4.643559  | -10.152891 | -3.243653 |
| 84  | 7 | 0 | 7.172828  | 4.266513   | -2.715685 |
| 85  | 6 | 0 | 8.106892  | 3.652106   | -1.870887 |
| 86  | 6 | 0 | 6.030874  | 4.638671   | -2.027168 |
| 87  | 6 | 0 | 6.160656  | 4.097277   | -0.570567 |
| 88  | 6 | 0 | 7.578428  | 3.549461   | -0.576616 |
| 89  | 7 | 0 | 7.186587  | -4.246813  | 2.708135  |
| 90  | 6 | 0 | 8.118110  | -3.630744  | 1.861753  |
| 91  | 6 | 0 | 6.044504  | -4.621832  | 2.021390  |
| 92  | 6 | 0 | 6.171193  | -4.081147  | 0.564250  |
| 93  | 6 | 0 | 7.587684  | -3.530001  | 0.568133  |
| 94  | 6 | 0 | 8.347297  | 3.015346   | 0.442940  |
| 95  | 6 | 0 | 9.639972  | 2.554364   | 0.152492  |
| 96  | 6 | 0 | 10.145690 | 2.646725   | -1.144372 |
| 97  | 6 | 0 | 9.386056  | 3.205982   | -2.180579 |
| 98  | 6 | 0 | 8.353955  | -2.994613  | -0.452711 |
| 99  | 6 | 0 | 9.645955  | -2.530514  | -0.164227 |
| 100 | 6 | 0 | 10.153625 | -2.621064  | 1.132001  |
| 101 | 6 | 0 | 9.396662  | -3.181530  | 2.169505  |
| 102 | 6 | 0 | 7.384004  | 4.563747   | -4.114422 |
| 103 | 6 | 0 | 7.400303  | -4.542790  | 4.106754  |
| 104 | 8 | 0 | 5.113665  | -5.242907  | 2.500844  |
| 105 | 8 | 0 | 5.097990  | 5.257908   | -2.505029 |
| 106 | 7 | 0 | 5.788179  | 7.992786   | 3.557424  |
| 107 | 6 | 0 | 5.326961  | 7.204108   | 4.606880  |
| 108 | 6 | 0 | 5.184188  | 5.864876   | 4.151290  |
| 109 | 6 | 0 | 5.557689  | 5.862443   | 2.752253  |
| 110 | 6 | 0 | 5.908477  | 7.198576   | 2.422660  |
| 111 | 6 | 0 | 5.026342  | 7.564386   | 5.922190  |
| 112 | 6 | 0 | 4.590300  | 6.560548   | 6.784894  |
| 113 | 6 | 0 | 4.451782  | 5.231070   | 6.352458  |
| 114 | 6 | 0 | 4.746418  | 4.877629   | 5.038361  |
| 115 | 6 | 0 | 5.611482  | 4.870893   | 1.771729  |
| 116 | 6 | 0 | 6.004501  | 5.202091   | 0.473856  |
| 117 | 6 | 0 | 6.340765  | 6.534914   | 0.169175  |
| 118 | 6 | 0 | 6.293771  | 7.544282   | 1.126562  |
| 119 | 6 | 0 | 5.927154  | 9.436628   | 3.589337  |
| 120 | 6 | 0 | 4.626491  | 10.164181  | 3.242788  |
| 121 | 1 | 0 | -1.811822 | -1.088463  | 1.857838  |

|     |   |   |            |           |           |
|-----|---|---|------------|-----------|-----------|
| 122 | 1 | 0 | 0.650493   | -1.081034 | 1.851682  |
| 123 | 1 | 0 | 0.645100   | 1.083627  | -1.852612 |
| 124 | 1 | 0 | -1.817193  | 1.084584  | -1.855388 |
| 125 | 1 | 0 | -3.671743  | -1.941652 | 0.895073  |
| 126 | 1 | 0 | -3.679290  | 1.932565  | -0.890605 |
| 127 | 1 | 0 | -10.634545 | 0.999077  | -0.041166 |
| 128 | 1 | 0 | -9.828397  | 4.586529  | -2.280666 |
| 129 | 1 | 0 | -7.613893  | 5.701606  | -3.414727 |
| 130 | 1 | 0 | -3.479968  | 4.631325  | -3.951881 |
| 131 | 1 | 0 | -3.773842  | 2.637191  | -2.618259 |
| 132 | 1 | 0 | -9.813184  | -4.612284 | 2.292442  |
| 133 | 1 | 0 | -10.633249 | -1.023758 | 0.060087  |
| 134 | 1 | 0 | -3.757443  | -2.662923 | 2.611868  |
| 135 | 1 | 0 | -3.465690  | -4.662872 | 3.941627  |
| 136 | 1 | 0 | -7.601975  | -5.726503 | 3.409526  |
| 137 | 1 | 0 | -13.098924 | -4.895494 | 0.420053  |
| 138 | 1 | 0 | -11.687247 | -4.544549 | -0.596490 |
| 139 | 1 | 0 | -11.481987 | -5.389235 | 0.942513  |
| 140 | 1 | 0 | -13.450868 | -3.624024 | 2.607609  |
| 141 | 1 | 0 | -12.280759 | -2.391532 | 3.119016  |
| 142 | 1 | 0 | -11.841481 | -4.103058 | 3.164730  |
| 143 | 1 | 0 | -12.453262 | -2.100657 | -0.640664 |
| 144 | 1 | 0 | -13.795070 | -2.527260 | 0.427732  |
| 145 | 1 | 0 | -12.695737 | -1.218937 | 0.878677  |
| 146 | 1 | 0 | -4.572906  | -7.052554 | 6.650026  |
| 147 | 1 | 0 | -3.838911  | -5.594570 | 5.970461  |
| 148 | 1 | 0 | -5.522865  | -5.560613 | 6.508457  |
| 149 | 1 | 0 | -6.260917  | -8.360311 | 5.400286  |
| 150 | 1 | 0 | -6.869713  | -7.847008 | 3.822964  |
| 151 | 1 | 0 | -7.300427  | -6.937155 | 5.284640  |
| 152 | 1 | 0 | -4.454830  | -7.813923 | 2.959753  |
| 153 | 1 | 0 | -3.202056  | -6.934758 | 3.844572  |
| 154 | 1 | 0 | -3.938697  | -8.373644 | 4.562371  |
| 155 | 1 | 0 | -13.799882 | 2.497237  | -0.398398 |
| 156 | 1 | 0 | -12.700126 | 1.190123  | -0.851583 |
| 157 | 1 | 0 | -12.453453 | 2.074355  | 0.665593  |
| 158 | 1 | 0 | -13.108134 | 4.866461  | -0.396838 |
| 159 | 1 | 0 | -11.494171 | 5.362666  | -0.926038 |
| 160 | 1 | 0 | -11.692066 | 4.519923  | 0.615026  |
| 161 | 1 | 0 | -11.859262 | 4.072547  | -3.144956 |
| 162 | 1 | 0 | -12.294953 | 2.360184  | -3.095215 |
| 163 | 1 | 0 | -13.465592 | 3.591049  | -2.581245 |
| 164 | 1 | 0 | -6.169429  | 7.417680  | -6.467691 |
| 165 | 1 | 0 | -6.041902  | 5.648021  | -6.453695 |

|     |   |   |           |            |           |
|-----|---|---|-----------|------------|-----------|
| 166 | 1 | 0 | -7.325188 | 6.451652   | -5.541102 |
| 167 | 1 | 0 | -5.585599 | 8.763355   | -4.381119 |
| 168 | 1 | 0 | -5.038485 | 7.937649   | -2.909118 |
| 169 | 1 | 0 | -6.726566 | 7.813382   | -3.419428 |
| 170 | 1 | 0 | -3.591330 | 5.940737   | -5.772031 |
| 171 | 1 | 0 | -3.822159 | 7.690837   | -5.732445 |
| 172 | 1 | 0 | -3.178455 | 6.861118   | -4.311820 |
| 173 | 1 | 0 | 1.665146  | 2.793819   | -0.367129 |
| 174 | 1 | 0 | 3.498654  | 4.441687   | -0.608863 |
| 175 | 1 | 0 | 6.452505  | 1.349151   | -0.204600 |
| 176 | 1 | 0 | 6.456013  | -1.332358  | 0.197600  |
| 177 | 1 | 0 | 3.510113  | -4.432116  | 0.604685  |
| 178 | 1 | 0 | 1.672355  | -2.788796  | 0.364507  |
| 179 | 1 | 0 | 6.558631  | -8.550259  | -0.862865 |
| 180 | 1 | 0 | 6.642855  | -6.775604  | 0.839404  |
| 181 | 1 | 0 | 5.341346  | -3.836626  | -2.014378 |
| 182 | 1 | 0 | 4.640124  | -3.840876  | -4.708363 |
| 183 | 1 | 0 | 4.113772  | -4.467214  | -7.055218 |
| 184 | 1 | 0 | 4.358608  | -6.807334  | -7.815710 |
| 185 | 1 | 0 | 5.135172  | -8.579064  | -6.268712 |
| 186 | 1 | 0 | 6.291578  | -9.706788  | -4.589641 |
| 187 | 1 | 0 | 6.740519  | -9.698586  | -2.894627 |
| 188 | 1 | 0 | 4.787907  | -11.237351 | -3.276589 |
| 189 | 1 | 0 | 4.307011  | -9.878168  | -2.240090 |
| 190 | 1 | 0 | 3.853320  | -9.886597  | -3.951131 |
| 191 | 1 | 0 | 7.950331  | 2.957637   | 1.451496  |
| 192 | 1 | 0 | 10.249073 | 2.125795   | 0.941450  |
| 193 | 1 | 0 | 11.147615 | 2.287386   | -1.358041 |
| 194 | 1 | 0 | 9.786195  | 3.288604   | -3.185263 |
| 195 | 1 | 0 | 7.955518  | -2.938322  | -1.460765 |
| 196 | 1 | 0 | 10.253012 | -2.100952  | -0.954220 |
| 197 | 1 | 0 | 11.155013 | -2.259328  | 1.344143  |
| 198 | 1 | 0 | 9.798332  | -3.262721  | 3.173695  |
| 199 | 1 | 0 | 6.486982  | 5.066408   | -4.476975 |
| 200 | 1 | 0 | 8.250554  | 5.220940   | -4.247975 |
| 201 | 1 | 0 | 7.546188  | 3.644011   | -4.686402 |
| 202 | 1 | 0 | 6.504875  | -5.047210  | 4.470801  |
| 203 | 1 | 0 | 8.268469  | -5.198006  | 4.239506  |
| 204 | 1 | 0 | 7.561238  | -3.622375  | 4.677995  |
| 205 | 1 | 0 | 5.122305  | 8.588814   | 6.266270  |
| 206 | 1 | 0 | 4.349449  | 6.814841   | 7.812561  |
| 207 | 1 | 0 | 4.107578  | 4.474894   | 7.050595  |
| 208 | 1 | 0 | 4.633252  | 3.850981   | 4.702948  |
| 209 | 1 | 0 | 5.332792  | 3.849619   | 2.008527  |

|     |   |   |          |           |           |
|-----|---|---|----------|-----------|-----------|
| 210 | 1 | 0 | 6.627891 | 6.792525  | -0.844117 |
| 211 | 1 | 0 | 6.542089 | 8.565906  | 0.859416  |
| 212 | 1 | 0 | 6.276091 | 9.719331  | 4.587243  |
| 213 | 1 | 0 | 6.723810 | 9.713007  | 2.891896  |
| 214 | 1 | 0 | 4.769377 | 11.248813 | 3.276444  |
| 215 | 1 | 0 | 4.289603 | 9.889755  | 2.239256  |
| 216 | 1 | 0 | 3.837130 | 9.896266  | 3.950634  |

---
